# Supplementary material for: Socioeconomic inequalities in caries experience, care level and dental attendance in primary school children in Belgium: a cross-sectional survey
Source: PubMed Central journal article supplement — BMJ Open. 2017 Jul 20;7(7):e015042. doi: 10.1136/bmjopen-2016-015042 (PMC5541598; doi:10.1136/bmjopen-2016-015042), 2017-07-20
Supplement: bmjopen-2016-015042.draft_revisions.pdf [file bmjopen-2016-015042.draft_revisions.pdf]

# BMJ Open

## Socioeconomic inequalities in oral health aspects in primary school children: a cross-sectional survey

|                                 |                                                                                                                                                                                                       |
|---------------------------------|-------------------------------------------------------------------------------------------------------------------------------------------------------------------------------------------------------|
| Journal:                        | <i>BMJ Open</i>                                                                                                                                                                                       |
| Manuscript ID                   | bmjopen-2016-015042                                                                                                                                                                                   |
| Article Type:                   | Research                                                                                                                                                                                              |
| Date Submitted by the Author:   | 16-Dec-2016                                                                                                                                                                                           |
| Complete List of Authors:       | Lambert, Martijn; Universiteit Gent, Dentistry<br>Vanobbergen, Jacques; Universiteit Gent, Dentistry<br>Martens, Luc; Universiteit Gent, Dentistry<br>De Visschere, Luc; Universiteit Gent, Dentistry |
| <b>Primary Subject Heading</b>: | Dentistry and oral medicine                                                                                                                                                                           |
| Secondary Subject Heading:      | Public health, Epidemiology                                                                                                                                                                           |
| Keywords:                       | EPIDEMIOLOGY, ORAL MEDICINE, Community child health < PAEDIATRICS, PUBLIC HEALTH                                                                                                                      |
|                                 |                                                                                                                                                                                                       |

SCHOLARONE™  
Manuscripts

Peer review only

1  
2  
3 **Socioeconomic inequalities in oral health aspects in primary school**  
4  
5 **children: a cross-sectional survey**  
6  
7

8 Martijn J. Lambert<sup>1</sup>, Jacques SN Vanobbergen<sup>2</sup>, Luc C. Martens<sup>3</sup>, Luc M.J. De Visschere<sup>4</sup>  
9

10  
11 <sup>1</sup> drs., Department of Community Dentistry and Oral Public Health, Dental School, Ghent  
12 University, 185, De Pintelaan, 9000 Ghent, Belgium  
13

14  
15  
16 <sup>2</sup> MSD PhD, Department of Community Dentistry and Oral Public Health, Dental School,  
17 Ghent University, 185, De Pintelaan, 9000 Ghent, Belgium  
18

19  
20  
21 <sup>3</sup> MSD PhD, Chair of Dept Paediatric Dentistry and Special Care, Paecomedis research  
22 cluster, Dental School, Ghent University, 185, De Pintelaan, 9000 Ghent, Belgium  
23

24  
25  
26 <sup>4</sup> MSD PhD, Department of Community Dentistry and Oral Public Health, Dental School,  
27 Ghent University, 185, De Pintelaan, 9000 Ghent, Belgium  
28

29  
30  
31 **author address:**  
32

33  
34  
35 drs. Martijn Lambert  
36

37 Department of Community Dentistry  
38

39 Dental School Ghent University  
40

41 De Pintelaan 185, 9000 Gent (Belgium)  
42

43  
44 0032 494 89 64 42  
45

46 email:  
47

48 [lambert\\_martijn@hotmail.com](mailto:lambert_martijn@hotmail.com)  
49

50 [Martijn.Lambert@UGent.be](mailto:Martijn.Lambert@UGent.be)  
51

52  
53 **Key words**  
54  
55  
56  
57  
58  
59  
60

1  
2  
3 Oral Health (MeSH)

4  
5 Healthcare disparities (MeSH)

6  
7 Social class (MeSH)

8  
9 Pediatric Dentistry

10  
11  
12 **word count:** 3,380

13  
14  
15  
16  
17  
18  
19  
20  
21  
22  
23  
24  
25  
26  
27  
28  
29  
30  
31  
32  
33  
34  
35  
36  
37  
38  
39  
40  
41  
42  
43  
44  
45  
46  
47  
48  
49  
50  
51  
52  
53  
54  
55  
56  
57  
58  
59  
60

For peer review only

**Abstract**

Objectives: Oral health inequality in children is a widespread and well-documented problem in oral health care. However, objective and reliable methods to determine these inequalities in all oral health aspects, including both dental attendance and oral health, are rather scarce.

Aims: to explore oral health inequalities and to assess the impact of socio-economic factors on oral health, oral health behaviour and dental compliance of primary schoolchildren.

Methods: Data collection was executed in 2014 within a sample of 2,216 children in 105 primary schools in Flanders, by means of an oral examination and a validated questionnaire.

Intermutual Agency database was consulted to objectively determine individuals' social state and frequency of utilization of oral health care services. Underprivileged children were compared to more fortunate children for their mean DMFt, DMFs, Plaque index, Care Index (CI), Restorative Index (RI), Treatment Index (TI), knowledge and attitude. Differences in proportions for dichotomous variables (RI100%, TI100% and being a regular dental attender) were analysed. The present study was approved by the Ethics Committee of the University Hospital Ghent (2010/061). All parents signed an informed consent form prior to data collection. All schools received information about the study protocol and agreed to participate. Children requiring dental treatment or periodic recall were referred to the local dentist.

Results: Underprivileged children showed worse outcomes for all explanatory variables ( $p < 0.05$ ). In the low-income group, 78.4% was caries free, compared to 88.4% for the other children. Half of the low-income children could be considered as regular dental attenders, whether 12.6% did not have any dental visit during a five year period.

Conclusion: Oral health, oral hygiene, oral health care level and dental attendance patterns are strongly negatively affected by children's social class, leading to oral health inequalities in Belgian primary school children.

## Strengths and limitations

### Strengths:

- Large and random selected sample of children in the last year of primary school.
- All aspects of oral health and oral health behaviour are considered in this paper.
- Oral health and oral health behaviour are linked to social security databases on oral health care utilization for a 5-year period. This objective information is seldom available in international literature on health care utilization, but is far more reliable than a self-administered questionnaire, avoiding bias.

### Limitations:

- Sample only includes Belgian subjects
- The design of the study does not allow us to identify specific causes for inequalities in oral health and dental non-attendance, only associations.
- Since Glimlachen.be® is a four-year longitudinal program visiting schools, most of the subjects will have received previous dental screenings before the present data collection. These screenings might have positively influenced the oral health and oral health behaviour of all children, resulting in an underestimation of oral health related problems. However, this influence should be equal for both compared groups.

## Introduction

### *Background*

1  
2  
3 Although dental caries is largely preventable, it is a major public health problem, since  
4 untreated tooth decay remains by far the most common chronic disease worldwide (1).  
5  
6 International data on childhood caries epidemiology confirm that dental caries remains a  
7  
8 'significant and consequential disease of childhood', being increasingly localized in a  
9  
10 subgroup of high-risk children, both in developing and developed countries (2).  
11  
12

13  
14 Dental caries is a multifactorial disease. Consumption of sugary substances and poor oral  
15 health practices largely affect the occurrence of tooth decay. Literature provides powerful  
16  
17 evidence that dental caries is positively correlated to sugar intake (3) and adversely correlated  
18  
19 to tooth brushing with a fluoridated toothpaste (4). However, all dietary and behavioural  
20  
21 determinants of caries are influenced by people's social context, resulting in worsened oral  
22  
23 health outcomes in underprivileged groups. Socio-economic inequalities in pre-school  
24  
25 children have already been reported nationally and internationally. Van den Branden not only  
26  
27 highlights the occurrence of early childhood caries in preschool children (3-5 years old), but  
28  
29 also provides some evidence that a social gradient in early childhood caries can be suggested  
30  
31 (5). This confirms results from earlier national reports and is consistent with international  
32  
33 literature (2,6,7,8). For the Belgian situation however, the mentioned national reports only  
34  
35 include preschool children. Recent data from children attending school are scarce, but  
36  
37 certainly needed (9).  
38  
39  
40  
41  
42  
43

44 The occurrence of dental caries and other oral diseases is not the only domain in which  
45  
46 inequalities appear. Use of oral health care facilities and regular preventive dental check-up  
47  
48 are also affected by social variables. In adulthood, it is clear that dental non-attenders rank  
49  
50 significantly more often at the lower end of the socioeconomic scale (10). Regarding the  
51  
52 financial aspect of oral health care in Belgium a fee-for-service payment method is used,  
53  
54 combined with a compulsory health insurance. In this system a patient pays the entire dental  
55  
56 visit cost to the dentist at first hand, in order to recover at second hand the biggest part of this  
57  
58  
59  
60

1  
2  
3 sum from his health insurance agency. To reduce inequalities in (oral) health, some national  
4  
5 government initiatives have been implemented yet. Underprivileged individuals can be  
6  
7 entitled to an increased allowance for health care interventions when the family income is  
8  
9 low. In case of excessive medical costs, less fortunate people can also have access to the  
10  
11 mechanism known as the “Maximum Bill”, calculating a cost limit for medical care. All  
12  
13 medical costs exceeding this limit will be completely reimbursed. Furthermore, a full  
14  
15 coverage of regular treatment costs for all children under the age of 18 is guaranteed,  
16  
17 provided that the dentist acceded to the convention between the national health insurance  
18  
19 agency and dental professional organisations. For 2015-2016 period, 62.64% of Belgian  
20  
21 dentists partially or completely take part in this convention.  
22  
23

### 24 25 26 *Objectives*

27  
28 Objective data on children’s dental non-attendance and health consumption are scarce, not  
29  
30 only in Belgium, but worldwide. By involving the Intermutual Agency (IMA) national  
31  
32 database data on utilization of (oral) health care services, this article provides objective  
33  
34 information on oral health consumption and dental attendance.  
35  
36

37  
38 In this study the authors aimed to explore existing oral health inequalities and to assess the  
39  
40 impact of socio-economic factors on oral health, oral health behaviour and dental compliance  
41  
42 of primary schoolchildren.  
43  
44  
45  
46  
47  
48

### 49 **Materials and methods**

#### 50 51 52 *Study design, settings and population*

53  
54  
55 The present survey fits into the context of Glimlachen.be®, a prospective four-year  
56  
57 longitudinal oral health promotion program, visiting primary schools in Flanders (Belgium)  
58  
59  
60

1  
2  
3 with a mobile dental unit. It is conducted by dentists of the Flemish Dental Association under  
4  
5 the authority of the National Institute for Health and Disability Insurance (NIHDI).  
6  
7

8 The present cross-sectional study reports on the oral health condition of children in the last  
9  
10 year of primary school, recruited in all schools in Flanders within the three educational  
11  
12 networks (GO – publicly run under the authority of the Flemish Community (15%); OGO  
13  
14 publicly funded and publicly run by local authorities or provincial authorities (15%; VGO  
15  
16 publicly funded and privately run by private non-profit-making organisations, mainly catholic  
17  
18 schools (70%)).  
19  
20

21  
22 The study population is estimated to be about 68000 children in 2340 schools. The unit of  
23  
24 randomisation was the school. Schools were randomly selected with an oversampling of 2%  
25  
26 for schools with assistance from special education for disabled children or children with  
27  
28 learning or educational difficulties. The sample size was determined based on a confidence  
29  
30 level of 95% and a margin of error of 2.5%.  
31  
32

33  
34 Data were collected in 2014 from a representative sample of 2,216 primary school children in  
35  
36 105 different schools in Flanders.  
37  
38

#### 39 *Data collection*

40  
41  
42 In all participants, oral health condition was recorded by visual inspection with a mobile  
43  
44 dental unit in school premises by 44 well-trained and calibrated dentist-examiners. Calibration  
45  
46 was undertaken to avoid bias, using a series of full-mouth photographs simulating the clinical  
47  
48 examination of patients, set up in a PowerPoint presentation. Intra Class Correlation  
49  
50 Coefficient (ICC) for all examiners was 0.86 with a 95% confidence interval of 0.82 to 0.90.  
51  
52  
53 General kappa score was 0.72.  
54  
55  
56  
57  
58  
59  
60



1  
2  
3 Individual children have been examined for several oral health parameters. DMFT was used  
4 as outcome variable to count the number of decayed (D), missing (M) and filled (F) teeth.  
5  
6  
7 Caries detection was based on the International Caries Detection and Assessment System  
8 (ICDAS), using six subcategories of caries going from first visible change in enamel (score 1)  
9 to extensive cavity with visible dentin possibly reaching the pulp (score 6). Both caries at D1  
10 level (score > 0: early enamel lesions and decay into dentine ) and D3 level (score  $\geq 4$ : obvious  
11 decay into dentine, excluding early lesions restricted to the enamel) are taken into account.  
12  
13 The level of provided care has been approached through the restorative index (RI= (Ft/D3Ft)  
14 \*100), care index (CI= (Ft/D3MFt)\*100) and treatment index (TI= (MF/D3MFt)\*100), all  
15 ranging from 0 to 100%. Restorative and treatment index were also dichotomized to divide  
16 subjects into two groups: children without untreated caries (RI = 100%, TI=100%) and  
17 children with untreated caries (RI<100%, TI<100%).  
18  
19

20  
21  
22  
23  
24  
25  
26  
27  
28  
29  
30 Clinical amount of dental plaque was measured using the Plaque Index of Sillness and Loe  
31 (11). This index calculates the mean buccal surface plaque score of six reference teeth on a  
32 scale from 0 (no plaque) to 3 (visible plaque on more than one third of the buccal surface).  
33  
34  
35

36  
37  
38 Both knowledge and attitude were assessed by a validated and reliable questionnaire,  
39 answered by the children. An expert panel tested the content validity of the items, after which  
40 the questionnaire was pretested in a small subgroup of primary school children on two  
41 different time points to check the discriminatory power and reliability (test-retest). A higher  
42 score out of ten correlates to more knowledge and a better attitude.  
43  
44  
45  
46  
47

48  
49  
50 To explore the impact of social environment on oral health and oral health related behaviour,  
51 knowledge and attitude, a summary measure was used to characterize the deprivation level.  
52  
53 All parameters have been analysed in children eligible for the “Maximum Bill” for at least  
54 one year between 2009 and 2013, compared to those who cannot take profit of this system  
55  
56  
57  
58  
59  
60

(dichotomous explanatory variable). The Maximum Bill measure is automatically assigned to individuals in order to reimburse medical costs exceeding a certain limit, based on income levels. Accordingly, those who benefit from it correspond to underprivileged individuals. Those without can be considered as middle and high-income subjects. The combined questionnaire and oral health examination data were supplemented with the Intermutual Agency (IMA) national database data on utilization of (oral) health care services, in order to trace individuals who can make use of the Maximum Bill and to obtain information on participants' frequency of utilization of oral health care services. This includes all attested dental treatments and regular preventive dental check-ups over a period from 2009 to 2013. By consensus, participants are considered as regular dental attenders if IMA database reported at least one dental visit in three different years over a four-year period, excluding urgency treatments. Subsequently, a dichotomous variable has been created to distinguish regular dental attenders from non-regular dental attenders.

#### *Data analysis*

Data analysis was carried out in the IBM SPSS Statistics V22.0 (SPSS Inc., Chicago, IL, USA). Independent Sample T-test was used to compare underprivileged and more fortunate individuals for their mean DMFT, DMFS, Plaque index, Care Index, Restorative Index, Treatment Index, knowledge and attitude scores. A parametrical test was used, based on the central limit theorem. Differences in proportions for dichotomous variables (RI100%, TI100% and being a regular dental attender) have been compared in crosstabs, using a Chi Square statistical test. Alpha was set at  $< 0.05$ .

The approach used to deal with uncomplete records and so to avoid bias, was to compare the proportion of children eligible for the "Maximum Bill" in both responders and non-responders (no clinical data available), by using the Chi Square statistical test. This social parameter

1  
2  
3 could be determined for all children by using the national registration number of the child and  
4  
5 the IMA database.  
6  
7  
8  
9

### 10 11 *Ethical aspects*

12  
13  
14 The present study was approved by the Ethics Committee of the University Hospital Ghent  
15  
16 (2010/061). All parents signed an informed consent form prior to data collection. All schools  
17  
18 received information about the study protocol and agreed to participate. Children requiring  
19  
20 dental treatment or periodic recall were referred to the local dentist.  
21  
22  
23  
24  
25  
26

### 27 **Results**

28  
29  
30 Sample consisted of 2,216 Flemish primary school children with a mean age of 11.25 years  
31  
32 ( $\pm 0.68$ ). Data analysis could be performed in 88.2% (n=1,954). Uncomplete records are due to  
33  
34 failure to obtain consent and child's absence from school on the day of examination. From  
35  
36 these 1,954 children, 1,771 completed the questionnaire. Comparing the social status of  
37  
38 responders and non-responders, there was no relationship between the missingness of data and  
39  
40 the distribution of the social indicator (p=0.4).  
41  
42  
43

44  
45 More than 19% (n=374) of the children made use of the Maximum Bill. Being part of this  
46  
47 subgroup significantly affected oral health and oral health behaviour, as demonstrated in table  
48  
49 1. Underprivileged children showed worse outcomes for all explanatory variables. They had a  
50  
51 higher plaque index and higher DMFt and DMFs scores, both at D1 and D3 level. Overall  
52  
53 care level was significantly lower, resulting in a lower care index, treatment index and  
54  
55 restorative index. Both knowledge and attitude scores were slightly but significantly lower in  
56  
57 low-income children.  
58  
59  
60

1  
2  
3 Regarding the proportion of participants being completely treated for caries, underprivileged  
4 children again differ from their more fortunate counterparts. According to table 2, 78.4% of  
5 the low-income children was caries free (DMFT=0), compared to 88.4% for the high income  
6 group. From those having a DMFT>0, 55.3% of the Maximum Bill group children were  
7 found to have a 100% Treatment index against 65.8% for children of higher social class. The  
8 same trend appeared when comparing the 100% Restorative index, resulting in strongly  
9 significant differences. Half of the low-income children (50.3%) could be considered as  
10 regular dental attenders for the period between 2009 and 2013, whereas 12.6% did not have  
11 any dental visit during these five year period. Middle- and high-income children visited the  
12 dentist on a more regular base, resulting in a 77.7% rate for regular dental attendance. Only  
13 3.4% of these children did not report any dental visit. All of these differences proved to be  
14 statistically significant.  
15  
16  
17  
18  
19  
20  
21  
22  
23  
24  
25  
26  
27  
28  
29  
30  
31  
32

### 33 Discussion

34  
35  
36 Oral health inequalities are clearly visible within the present sample of primary school  
37 children. Since 2,216 subjects were randomly selected in 105 different primary schools in  
38 Flanders, results can be extrapolated to the entire Flemish region.  
39  
40  
41  
42

43 All oral health related parameters are strongly and significantly affected by participants'  
44 social class. Not only caries experience, by means of DMFT and DMFs, proves to be higher in  
45 underprivileged groups, but also oral hygiene (plaque index) and the level of care seems to  
46 depend on families' social context. A 10% gap emerges when comparing Care index,  
47 Treatment index and Restorative index for middle/high-income and low income children, in  
48 disadvantage of the latter group. Statistical analysis clearly demonstrates underprivileged  
49 children to visit less frequently the dental practitioner. One out of eight low-income children  
50  
51  
52  
53  
54  
55  
56  
57  
58  
59  
60

1  
2  
3 (12.6%) did not see a dentist one single time during the five years prior to data collection.  
4  
5 This dental absenteeism is almost four times higher in underprivileged groups compared to  
6  
7 the more fortunate subgroups.  
8  
9

10 The present Flemish/Belgian results on oral health inequalities are not a unique phenomenon,  
11  
12 but are in accordance with global findings. International literature is overloaded with recent  
13  
14 evidence demonstrating social inequalities in oral health. A systematic review by Scwendicke  
15  
16 shows that low social class is associated with an increased risk of dental caries, especially in  
17  
18 more developed countries (12). Childhood financial hardship not only has a main impact on  
19  
20 individuals oral health during childhood, but also in later life. Poulton et al. (13) revealed that  
21  
22 low childhood socio-economic status (SES) contributes to increased adult levels of caries and  
23  
24 periodontal disease, even after adjusting for adult SES. Listl et al. (14) confirmed these  
25  
26 findings, showing the long-term adverse effects of financial problems in childhood on oral  
27  
28 health in middle and later adulthood.  
29  
30  
31  
32

33 The today's persistence of social inequalities, both in Flanders and in the entire world, is food  
34  
35 for thought. From the most negative point of view, one could state that all previous oral health  
36  
37 promotion campaigns, health promoting schools and governmental interventions simply failed  
38  
39 to close the social gap in oral health. Unfortunately, the present cross-sectional survey is not  
40  
41 able to uncover a specific reason for this failure. What needs to be considered and further  
42  
43 investigated, is the key role played by the family and environmental context in children's  
44  
45 dental adherence. It is clear that 12-year old children cannot be taken fully responsible for  
46  
47 being a dental non-attender. A systematic review of Freire de Castilho (15) reveals that  
48  
49 parental oral health habits affects children's oral health. For this reason, the authors of this  
50  
51 review state that oral health promotion programs need to put emphasis on the entire family  
52  
53 context, concerning their lifestyle and oral health behaviour.  
54  
55  
56  
57  
58  
59  
60

1  
2  
3 Regarding the financial aspect, basic dental costs are completely reimbursed in Belgium for  
4  
5 all children under the age of 18, so in fact differences in utilization of health care services for  
6  
7 financial reasons are not expected. However, in most dental practices, the often high dental  
8  
9 fee needs to be paid first by the client, to get it reimbursed by the health insurance agency  
10  
11 afterwards. Third party payment is allowed for minors, but not well established. Further,  
12  
13 37.36% of the Belgian dentists did not take part in the fee convention, bearing a risk of  
14  
15 potentially increased dental costs. Further research is needed to evaluate the effects of  
16  
17 different provider payment methods on social inequalities.  
18  
19

20  
21 Although oral health inequalities have always existed and are still remaining, society cannot  
22  
23 simply acquiesce in its existence. Dental caries is largely preventable, but still remains the  
24  
25 most prevalent chronic disease worldwide, mainly affecting high-risk subgroups (1,16).  
26  
27 Dental treatment is expensive, absorbing a considerable part of overall health care budget  
28  
29 (17). Focussing on prevention and tackling oral health inequalities not only improve  
30  
31 individuals' oral health and quality of life, but can also help in reducing governmental costs.  
32  
33 Watt et al. (18) call in the "London Charter on Oral Health Inequalities" for a more upstream  
34  
35 public health approach, targeting the deeper social, political and economic causes of oral  
36  
37 health inequalities. They advocate new multidisciplinary preventive strategies at local,  
38  
39 regional, national and international levels, based on a common risk factor approach. Quoting  
40  
41 the authors, "collaborative efforts among researchers, policy makers, public health  
42  
43 practitioners, clinical teams, and the public are urgently required". So, decisions on oral health  
44  
45 promotion and tackling oral health inequalities should not exclusively be made by  
46  
47 policymakers, but also involve dentists and intermediate partner organizations.  
48  
49  
50  
51

52  
53 The 'Marmot Review' (19) provides a guidance to assess the social gradient in health, by  
54  
55 introducing the method of 'proportionate universalism'. Interventions don't need to focus  
56  
57  
58  
59  
60

1  
2  
3 only on the most disadvantaged individuals, but should be universal and contain a scale and  
4  
5 intensity in accordance with subgroups' level of disadvantage.  
6  
7

## 8 **Conclusion**

9  
10 Oral health inequalities are an undeniable reality in primary school children in  
11  
12 Flanders/Belgium. Oral health, oral hygiene, oral health care level and dental attendance  
13  
14 patterns are strongly negatively affected by children's social class.  
15  
16

## 17 **Acknowledgement**

18  
19 The research presented in this report is part of the 'Glimlachen.be' project  
20  
21 ([www.glimlachen.be](http://www.glimlachen.be)), commissioned and financed by the 'Insurance Committee for Health  
22  
23 Care' of the 'Belgian National Institute for Health and Disability Insurance'.  
24  
25  
26

27  
28 The authors thank the Flemish Dental Association (VVT), the dentist examiners and dental  
29  
30 assistants and the school for their collaboration. All authors do not declare any potential  
31  
32 conflict of interest.  
33  
34

## 35 **Contributorship statement**

36  
37 All authors declare to have had substantial contributions to the conception and design of the  
38  
39 work, to have drafted and revised the work for important intellectual content. All authors gave  
40  
41 final approval of the version to be published; and agreement to be accountable for all aspects  
42  
43 of the work.  
44  
45  
46

47  
48 The corresponding author is drs. Martijn Lambert, dentist and researcher of Ghent University,  
49  
50 department of Community Dentistry and Oral Public Health. His task was to analyze data and  
51  
52 write the present article. Prof. Dr. J. Vanobbergen, Prof. Dr. L. De Visschere and Prof. Dr. L.  
53  
54 Martens are the PhD supervisors of drs. Lambert. They are all participating in the  
55  
56 'Glimlachen.be' project from its very beginning. In that way, they could provide essential  
57  
58  
59  
60

1  
2  
3 information on data collection procedure and other methodological aspects of the present  
4  
5 study. Their expertise was indispensable to realize this publication.  
6  
7

### 8 **Competing interests**

9  
10 All co-authors declare no competing interests  
11  
12

### 13 **Funding**

14  
15  
16  
17 There was no funding to analyze data or to report this paper. The only funding corresponds to  
18  
19 data collection (see acknowledgement).  
20  
21

### 22 **Data sharing statement**

23  
24  
25 Patient leveled data or full data set and statistical code book are available from the  
26  
27 corresponding author on request.  
28  
29  
30  
31  
32  
33  
34  
35  
36  
37  
38  
39  
40  
41  
42  
43  
44  
45  
46  
47  
48  
49  
50  
51  
52  
53  
54  
55  
56  
57  
58  
59  
60



## References

1. Marcenes W, Kassebaum NJ, Bernabe E, et al. Global burden of oral conditions in 1990-2010: a systematic analysis. *J Dent Res* 2013;92(7):592-597.
2. Edelstein BL. Pediatric caries worldwide: implications for oral hygiene products. *Compend Contin Educ Dent* 2005;26(5 Suppl 1):4-9.
3. Moynihan P. Sugars and Dental Caries: Evidence for Setting a Recommended Threshold for Intake. *Adv Nutr* 2016;15;7(1):149-56. DOI: 10.3945/an.115.009365.
4. Chaves SC, Vieira-da-Silva LM. Anticaries effectiveness of fluoride toothpaste: a meta-analysis. *Rev Saude Publica* 2002;36(5):598-606.
5. Van den Branden S, Van den Broucke S, Leroy R, et al. Oral health and oral health-related behaviour in preschool children: evidence for a social gradient. *Eur J Pediatr* 2013;172:231-37.
6. Declerck D, Leroy R, Martens L, et al. Factors associated with prevalence and severity of caries experience in preschool children. *Community Dent Oral Epidemiol* 2008;36:168-178.
7. Do LG. Distribution of Caries in children: variations between and within populations. *J Dent Res* 2012;91(6):536-543.
8. Willems S, Vanobbergen J, Martens L, et al. The independent impact of Household- and neighbourhood-based social determinants on Early Childhood Caries. *Fam Community Health* 2005;28:168-175.
9. Vanobbergen JN, Martens LC, Lesaffre E, et al. Parental occupational status related to dental caries experience in 7-year-old children in Flanders (Belgium). *Community Dent Health* 2001;18(4):256-262.

- 1  
2  
3 10. Listl S, Moeller J, Manski R. A multi-country comparison of reasons for dental non-  
4  
5 attendance. *Eur J Oral Sci* 2014;122(1):62-9.  
6  
7  
8 11. Löe H. The Gingival Index, the Plaque Index, and the Retention Index Systems. *J*  
9  
10 *Periodontol* 1967;38:610-616.  
11  
12  
13 12. Schwendicke F, Dörfer CE, Schlattmann P, et al. Socio-economic inequality and caries: a  
14  
15 systematic review and meta-analysis. *J Dent Res* 2015;94(1):10-18.  
16  
17  
18 13. Poulton R, Caspi A, Milne BJ, et al. Association between children's experience of socio-  
19  
20 economic disadvantage and adult health: a life-course study. *The Lancet*  
21  
22 2002;360(9346):1640-1645.  
23  
24  
25  
26 14. Listl S, Watt RG, Tsakos G. Early Life Conditions, Adverse Life Events, and Chewing  
27  
28 Ability at Middle and Later Adulthood. *Am J Public Health* 2014;104:55-61.  
29  
30  
31 15. Freire de Castilho AR, Mialhe FL, de Souza Barbosa T, et al. Influence of family  
32  
33 environment on children's oral health: a systematic review. *J Pediatr (Rio J)*  
34  
35 2013;89(2):116-123.  
36  
37  
38 16. Kassebaum NJ, Bernabé E, Dahiya M. Global Burden of Untreated Caries: A Systematic  
39  
40 Review and Metaregression. *J Dent Res* 2015;94(5) 650-658.  
41  
42 DOI:10.1177/0022034515573272  
43  
44  
45  
46 17. Listl S, Galloway J, Mossey PA. Global economic impact of dental diseases. *J Dent Res*  
47  
48 2015;94(10):1355-1361.  
49  
50  
51 18. Watt RG, Heilmann A, Listl S, Peres MA. London Charter on Oral Health Inequalities. *J*  
52  
53 *Dent Res* 2015;1-3. DOI: 10.1177/0022034515622198  
54  
55  
56  
57  
58  
59  
60

1  
2  
3 19. Marmot M et al. Fair society, healthy lives: The Marmot review, executive summary

4  
5 [Internet]. London: The Marmot Review. Februari 2010; ISBN 978-0-9564870-0-1:

6  
7 <http://www.instituteofhealthequity.org/projects/fair-society-healthy-lives-the-marmot-review>

8  
9  
10  
11  
12  
13  
14  
15  
16  
17  
18  
19  
20  
21  
22  
23  
24  
25  
26  
27  
28  
29  
30  
31  
32  
33  
34  
35  
36  
37  
38  
39  
40  
41  
42  
43  
44  
45  
46  
47  
48  
49  
50  
51  
52  
53  
54  
55  
56  
57  
58  
59  
60

For peer review only

Table 1: significant differences between children utilizing the "Maximum Bill" and those not using it

|                                            | Maximum Bill | N    | Mean  | SD    | p-value          |
|--------------------------------------------|--------------|------|-------|-------|------------------|
| <b>Mean Plaque index</b><br>(missing = 1)  | No           | 1602 | 0.41  | 0.48  | <b>&lt;0.001</b> |
|                                            | Yes          | 351  | 0.59  | 0.58  |                  |
| <b>DMFt (D1-level)</b><br>(missing = 1)    | No           | 1601 | 1.68  | 2.05  | <b>&lt;0.001</b> |
|                                            | Yes          | 352  | 2.79  | 2.43  |                  |
| <b>DMFt (D3-level)</b><br>(missing = 2)    | No           | 1600 | 0.78  | 1.42  | <b>&lt;0.001</b> |
|                                            | Yes          | 352  | 1.25  | 1.68  |                  |
| <b>DMFs (D1-level)</b><br>(missing = 0)    | No           | 1602 | 2,30  | 3.25  | <b>&lt;0.001</b> |
|                                            | Yes          | 352  | 4,02  | 4.07  |                  |
| <b>DMFs (D3-level)</b><br>(missing = 0)    | No           | 1602 | 1,18  | 2.51  | <b>&lt;0.001</b> |
|                                            | Yes          | 352  | 2,00  | 3.16  |                  |
| <b>Care index*</b><br>(missing = 0)        | No           | 544  | 70.33 | 42.14 | <b>&lt;0.001</b> |
|                                            | Yes          | 170  | 58.46 | 45.17 |                  |
| <b>Treatment index*</b><br>(missing = 0)   | No           | 544  | 73.13 | 40,83 | <b>0.02</b>      |
|                                            | Yes          | 170  | 64.79 | 43,75 |                  |
| <b>Restorative index*</b><br>(missing = 0) | No           | 537  | 72.18 | 41.57 | <b>0.01</b>      |
|                                            | Yes          | 164  | 62.22 | 44,79 |                  |
| <b>Knowledge</b><br>(missing = 183)        | No           | 1483 | 7.58  | 2.12  | <b>&lt;0.001</b> |
|                                            | Yes          | 288  | 6.78  | 2.49  |                  |
| <b>Attitude</b><br>(missing = 183)         | No           | 1482 | 8.37  | 1.32  | <b>0.002</b>     |
|                                            | Yes          | 289  | 8.10  | 1.44  |                  |

\*Of those having DMF>0

**Table 2: cross-table comparing children using the "Maximum Bill" to more privileged children, for dichotomous explanatory variables**

| Variable                              | Maximum Bill      |                  | p-value          |
|---------------------------------------|-------------------|------------------|------------------|
|                                       | No                | Yes              |                  |
| Treatment index (TI=100%)             | 65.8%<br>(n=358)  | 55.3%<br>(n=94)  | <b>0.01</b>      |
| Restorative index (RI=100%)           | 65.4%<br>(n=351)  | 53.7%<br>(n=88)  | <b>0.008</b>     |
| Regular dental attender*              | 77.7%<br>(n=1344) | 50.3%<br>(n=188) | <b>&lt;0.001</b> |
| No dental visit between 2009 and 2013 | 3.4%<br>(n=59)    | 12.6%<br>(n=47)  | <b>&lt;0.001</b> |
| Caries free proportion                | 88.4%<br>(n=1414) | 78.4%<br>(n=276) | <b>&lt;0.001</b> |

\* at least one dental visit in three different years over a four-year period, excluding urgency treatments

## STROBE Statement—checklist of items that should be included in reports of observational studies

|                              | Item No | Recommendation                                                                                                                                                                                                                                                                                                                                                                                                                                                                                                                                                                                                                                                                                                 |
|------------------------------|---------|----------------------------------------------------------------------------------------------------------------------------------------------------------------------------------------------------------------------------------------------------------------------------------------------------------------------------------------------------------------------------------------------------------------------------------------------------------------------------------------------------------------------------------------------------------------------------------------------------------------------------------------------------------------------------------------------------------------|
| <b>Title and abstract</b>    | 1       | (a) Indicate the study's design with a commonly used term in the title or the abstract<br><b>Cross-sectional survey (title page)</b><br>(b) Provide in the abstract an informative and balanced summary of what was done and what was found<br><b>Page 2</b>                                                                                                                                                                                                                                                                                                                                                                                                                                                   |
| <b>Introduction</b>          |         |                                                                                                                                                                                                                                                                                                                                                                                                                                                                                                                                                                                                                                                                                                                |
| Background/rationale         | 2       | Explain the scientific background and rationale for the investigation being reported<br><b>Background (page 4)</b>                                                                                                                                                                                                                                                                                                                                                                                                                                                                                                                                                                                             |
| Objectives                   | 3       | State specific objectives, including any prespecified hypotheses<br><b>Objectives (page 5)</b>                                                                                                                                                                                                                                                                                                                                                                                                                                                                                                                                                                                                                 |
| <b>Methods</b>               |         |                                                                                                                                                                                                                                                                                                                                                                                                                                                                                                                                                                                                                                                                                                                |
| Study design                 | 4       | Present key elements of study design early in the paper<br><b>Page 6</b>                                                                                                                                                                                                                                                                                                                                                                                                                                                                                                                                                                                                                                       |
| Setting                      | 5       | Describe the setting, locations, and relevant dates, including periods of recruitment, exposure, follow-up, and data collection<br><b>Page 6</b>                                                                                                                                                                                                                                                                                                                                                                                                                                                                                                                                                               |
| Participants                 | 6       | (a) <i>Cohort study</i> —Give the eligibility criteria, and the sources and methods of selection of participants. Describe methods of follow-up<br><i>Case-control study</i> —Give the eligibility criteria, and the sources and methods of case ascertainment and control selection. Give the rationale for the choice of cases and controls<br><i>Cross-sectional study</i> —Give the eligibility criteria, and the sources and methods of selection of participants <b>Page 6</b><br>(b) <i>Cohort study</i> —For matched studies, give matching criteria and number of exposed and unexposed<br><i>Case-control study</i> —For matched studies, give matching criteria and the number of controls per case |
| Variables                    | 7       | Clearly define all outcomes, exposures, predictors, potential confounders, and effect modifiers. Give diagnostic criteria, if applicable <b>Data collection (page 6-7)</b>                                                                                                                                                                                                                                                                                                                                                                                                                                                                                                                                     |
| Data sources/<br>measurement | 8*      | For each variable of interest, give sources of data and details of methods of assessment (measurement). Describe comparability of assessment methods if there is more than one group <b>(Page 7)</b>                                                                                                                                                                                                                                                                                                                                                                                                                                                                                                           |
| Bias                         | 9       | Describe any efforts to address potential sources of bias <b>Calibration of examiners (Page 6-7)</b>                                                                                                                                                                                                                                                                                                                                                                                                                                                                                                                                                                                                           |
| Study size                   | 10      | Explain how the study size was arrived at <b>Study design, settings and population (Page 6)</b>                                                                                                                                                                                                                                                                                                                                                                                                                                                                                                                                                                                                                |
| Quantitative variables       | 11      | Explain how quantitative variables were handled in the analyses. If applicable, describe which groupings were chosen and why <b>Page 7-8</b>                                                                                                                                                                                                                                                                                                                                                                                                                                                                                                                                                                   |
| Statistical methods          | 12      | (a) Describe all statistical methods, including those used to control for confounding<br><b>Data analysis (page 8)</b><br>(b) Describe any methods used to examine subgroups and interactions<br><b>Page 8</b><br>(c) Explain how missing data were addressed <b>Page 9</b>                                                                                                                                                                                                                                                                                                                                                                                                                                    |

---

(d) *Cohort study*—If applicable, explain how loss to follow-up was addressed

*Case-control study*—If applicable, explain how matching of cases and controls was addressed

*Cross-sectional study*—If applicable, describe analytical methods taking account of sampling strategy **Page 6**

---

(e) Describe any sensitivity analyses **Not applicable**

Continued on next page

For peer review only

**Results**

|                  |     |                                                                                                                                                                                                                                                                                                                                                                                                                                                              |
|------------------|-----|--------------------------------------------------------------------------------------------------------------------------------------------------------------------------------------------------------------------------------------------------------------------------------------------------------------------------------------------------------------------------------------------------------------------------------------------------------------|
| Participants     | 13* | (a) Report numbers of individuals at each stage of study—eg numbers potentially eligible, examined for eligibility, confirmed eligible, included in the study, completing follow-up, and analysed <b>Page 9</b><br>(b) Give reasons for non-participation at each stage <b>Page 10</b><br>(c) Consider use of a flow diagram <b>Not applicable (cross-sectional design)</b>                                                                                  |
| Descriptive data | 14* | (a) Give characteristics of study participants (eg demographic, clinical, social) and information on exposures and potential confounders <b>Page 10</b><br>(b) Indicate number of participants with missing data for each variable of interest <b>Table 1 (Page 18)</b><br>(c) <i>Cohort study</i> —Summarise follow-up time (eg, average and total amount)                                                                                                  |
| Outcome data     | 15* | <i>Cohort study</i> —Report numbers of outcome events or summary measures over time<br><i>Case-control study</i> —Report numbers in each exposure category, or summary measures of exposure<br><i>Cross-sectional study</i> —Report numbers of outcome events or summary measures<br><b>Tables page 17-18</b>                                                                                                                                                |
| Main results     | 16  | (a) Give unadjusted estimates and, if applicable, confounder-adjusted estimates and their precision (eg, 95% confidence interval). Make clear which confounders were adjusted for and why they were included<br>(b) Report category boundaries when continuous variables were categorized <b>Table 2 (Page 19)</b><br>(c) If relevant, consider translating estimates of relative risk into absolute risk for a meaningful time period <b>Not applicable</b> |
| Other analyses   | 17  | Report other analyses done—eg analyses of subgroups and interactions, and sensitivity analyses <b>Not applicable</b>                                                                                                                                                                                                                                                                                                                                         |

**Discussion**

|                  |    |                                                                                                                                                                                                         |
|------------------|----|---------------------------------------------------------------------------------------------------------------------------------------------------------------------------------------------------------|
| Key results      | 18 | Summarise key results with reference to study objectives <b>Page 10</b>                                                                                                                                 |
| Limitations      | 19 | Discuss limitations of the study, taking into account sources of potential bias or imprecision. Discuss both direction and magnitude of any potential bias<br><b>Strengths and limitations (page 3)</b> |
| Interpretation   | 20 | Give a cautious overall interpretation of results considering objectives, limitations, multiplicity of analyses, results from similar studies, and other relevant evidence<br><b>Page 10-11</b>         |
| Generalisability | 21 | Discuss the generalisability (external validity) of the study results<br><b>Page 10</b>                                                                                                                 |

**Other information**

|         |    |                                                                                                                                                                                                   |
|---------|----|---------------------------------------------------------------------------------------------------------------------------------------------------------------------------------------------------|
| Funding | 22 | Give the source of funding and the role of the funders for the present study and, if applicable, for the original study on which the present article is based<br><b>Acknowledgement (page 13)</b> |
|---------|----|---------------------------------------------------------------------------------------------------------------------------------------------------------------------------------------------------|

\*Give information separately for cases and controls in case-control studies and, if applicable, for exposed and unexposed groups in cohort and cross-sectional studies.

**Note:** An Explanation and Elaboration article discusses each checklist item and gives methodological background and published examples of transparent reporting. The STROBE checklist is best used in conjunction with this article (freely available on the Web sites of PLoS Medicine at <http://www.plosmedicine.org/>, Annals of Internal Medicine at



1  
2 <http://www.annals.org/>, and Epidemiology at <http://www.epidem.com/>). Information on the STROBE Initiative is  
3 available at [www.strobe-statement.org](http://www.strobe-statement.org).  
4  
5  
6  
7  
8  
9  
10  
11  
12  
13  
14  
15  
16  
17  
18  
19  
20  
21  
22  
23  
24  
25  
26  
27  
28  
29  
30  
31  
32  
33  
34  
35  
36  
37  
38  
39  
40  
41  
42  
43  
44  
45  
46  
47  
48  
49  
50  
51  
52  
53  
54  
55  
56  
57  
58  
59  
60

For peer review only

# BMJ Open

## Socioeconomic inequalities in caries experience, care level and dental attendance in primary school children in Belgium: a cross-sectional survey

|                                 |                                                                                                                                                                                                       |
|---------------------------------|-------------------------------------------------------------------------------------------------------------------------------------------------------------------------------------------------------|
| Journal:                        | <i>BMJ Open</i>                                                                                                                                                                                       |
| Manuscript ID                   | bmjopen-2016-015042.R1                                                                                                                                                                                |
| Article Type:                   | Research                                                                                                                                                                                              |
| Date Submitted by the Author:   | 04-May-2017                                                                                                                                                                                           |
| Complete List of Authors:       | Lambert, Martijn; Universiteit Gent, Dentistry<br>Vanobbergen, Jacques; Universiteit Gent, Dentistry<br>Martens, Luc; Universiteit Gent, Dentistry<br>De Visschere, Luc; Universiteit Gent, Dentistry |
| <b>Primary Subject Heading</b>: | Dentistry and oral medicine                                                                                                                                                                           |
| Secondary Subject Heading:      | Public health, Epidemiology                                                                                                                                                                           |
| Keywords:                       | EPIDEMIOLOGY, ORAL MEDICINE, Community child health < PAEDIATRICS, PUBLIC HEALTH                                                                                                                      |
|                                 |                                                                                                                                                                                                       |

SCHOLARONE™  
Manuscripts

1  
2  
3 **Socioeconomic inequalities in caries experience, care level and dental**  
4 **attendance in primary school children in Belgium: a cross-sectional survey**  
5  
6

7  
8 Martijn J. Lambert<sup>1</sup>, Jacques SN Vanobbergen<sup>2</sup>, Luc C. Martens<sup>3</sup>, Luc M.J. De Visschere<sup>4</sup>  
9

10  
11 1drs., Department of Community Dentistry and Oral Public Health, Dental School, Ghent  
12 University, 185, De Pintelaan, 9000 Ghent, Belgium  
13

14  
15  
16 2 MSD PhD, Department of Community Dentistry and Oral Public Health, Dental School,  
17 Ghent University, 185, De Pintelaan, 9000 Ghent, Belgium  
18

19  
20  
21 3MSD PhD, Chair of Dept Paediatric Dentistry and Special Care, Paecomedis research  
22 cluster, Dental School, Ghent University, 185, De Pintelaan, 9000 Ghent, Belgium  
23

24  
25  
26 4MSD PhD, Department of Community Dentistry and Oral Public Health, Dental School,  
27 Ghent University, 185, De Pintelaan, 9000 Ghent, Belgium  
28

29 Author address:  
30

31  
32  
33  
34  
35 drs. Martijn Lambert  
36

37  
38 Department of Community Dentistry  
39

40  
41 Dental School Ghent University  
42

43  
44 De Pintelaan 185, 9000 Gent (Belgium)  
45

46  
47 0032 494 89 64 42  
48

49  
50 email: [lambert\\_martijn@hotmail.com](mailto:lambert_martijn@hotmail.com)  
51

52  
53 word count: 4,389  
54  
55  
56  
57  
58  
59  
60

## Introduction

### *Background*

Although dental caries is largely preventable, it is a major public health problem, since untreated tooth decay remains by far the most common chronic disease worldwide (1). International data on childhood caries epidemiology confirm that dental caries remains a 'significant and consequential disease of childhood', being increasingly localized in a subgroup of high-risk children, both in developing and developed countries (2).

Dental caries is a multifactorial disease. Consumption of sugary substances and poor oral health practices largely affect the occurrence of tooth decay. Literature provides powerful evidence that dental caries is positively correlated to sugar intake (3) and adversely correlated to tooth brushing with a fluoridated toothpaste (4). However, all dietary and behavioural determinants of caries are influenced by people's social context, resulting in worsened oral health outcomes in underprivileged groups. Socio-economic inequalities in pre-school children have already been reported nationally and internationally. Van den Branden not only highlights the occurrence of early childhood caries in preschool children (3-5 years old), but also provides some evidence that a social gradient in early childhood caries can be suggested (5). This confirms results from earlier national reports and is consistent with international literature (2,6,7,8). For the Belgian situation however, the mentioned national reports only include preschool children. Recent data from children attending school are scarce, but certainly needed (9).

The occurrence of dental caries and other oral diseases is not the only domain in which inequalities appear. Use of oral health care facilities and regular preventive dental check-up are also affected by social variables. In adulthood, it is clear that dental non-attenders rank significantly more often at the lower end of the socioeconomic scale (10). Regarding the

1  
2  
3 financial aspect of oral health care in Belgium a fee-for-service payment method is used,  
4  
5 combined with a compulsory health insurance. In this system a patient pays the entire dental  
6  
7 visit cost to the dentist at first hand, in order to recover at second hand the biggest part of this  
8  
9 sum from his health insurance agency. To reduce inequalities in (oral) health, some national  
10  
11 government initiatives have been implemented. Underprivileged individuals can be entitled to  
12  
13 an increased allowance for health care interventions when the family income is low. In case of  
14  
15 excessive medical costs, people can also have access to the mechanism known as the  
16  
17 “Maximum Bill”, calculating a cost limit for medical care for every individual. The higher the  
18  
19 family income, the higher the cost limit. When medical costs exceed this limit, they will be  
20  
21 entirely and automatically reimbursed. Furthermore, a full coverage of regular treatment costs  
22  
23 for all children under the age of 18 is guaranteed, provided that the dentist acceded to the  
24  
25 convention between the national health insurance agency and dental professional  
26  
27 organisations. For 2015-2016 period, 62.64% of Belgian dentists partially or completely took  
28  
29 part in this convention.  
30  
31  
32

### 33 34 35 *Objectives*

36  
37 Objective data on children’s dental non-attendance and health consumption are scarce, not  
38  
39 only in Belgium, but worldwide. By involving the Intermutual Agency (IMA) national  
40  
41 database data on utilization of (oral) health care services, this article provides objective  
42  
43 information on oral health consumption and dental attendance.  
44  
45  
46

47  
48 In this study the authors aimed to explore existing oral health inequalities and to assess the  
49  
50 impact of socio-economic factors on oral health, oral health behaviour and dental compliance  
51  
52 of primary schoolchildren.  
53  
54  
55  
56  
57  
58  
59  
60

## Materials and methods

### *Study design, settings and population*

The present survey fits into the context of Glimlachen.be®, a prospective four-year longitudinal oral health promotion program, visiting primary schools in Flanders (Belgium) with a mobile dental unit. It is conducted by dentists of the Flemish Dental Association under the authority of the National Institute for Health and Disability Insurance (NIHDI).

The present cross-sectional study reports on the oral health condition of children in the last year of primary school, recruited in all schools in Flanders within the three educational networks (GO – publicly run under the authority of the Flemish Community (15%); OGO publicly funded and publicly run by local authorities or provincial authorities (15%; VGO publicly funded and privately run by private non-profit-making organisations, mainly catholic schools (70%)).

Data were collected in 2014 from a representative sample of 2,216 primary school children in 105 different schools in Flanders. The total study population is estimated to be about 68000 children in 2340 schools. Schools were randomly selected, based on a two-step stratification. In the first step, a stratified randomisation was executed at school-level, based on three strata: number of pupils, region and educational network. In the next step, randomisation occurred at the individual level. There was an oversampling of 2% for schools with assistance from special education for disabled children or children with learning or educational difficulties. The sample size was determined based on a confidence level of 95% and a margin of error of 2.5%. There were several sample size estimations, depending on the variability of the different outcome variables. The authors decided to include as many children as practically possible, based on the availability of three mobile dental units and the number of school days.

### *Data collection*

In all participants, oral health condition was recorded by visual inspection with a mobile dental unit in school premises by 44 well-trained and calibrated dentist-examiners. All examiners were blinded to the socioeconomic status of the children they examined. Calibration was undertaken to avoid bias, using a series of full-mouth photographs simulating the clinical examination of patients, set up in a PowerPoint presentation. Intra Class Correlation Coefficient (ICC) for all examiners was 0.86 with a 95% confidence interval of 0.82 to 0.90. General kappa score was 0.72.

Individual children have been examined for several oral health parameters. DMFT was used as outcome variable to count the number of decayed (D), missing (M) and filled (F) teeth. Caries detection was based on the International Caries Detection and Assessment System (ICDAS), using six subcategories of caries going from first visible change in enamel (score 1) to extensive cavity with visible dentin possibly reaching the pulp (score 6). Both caries at D1 level (score > 0: early enamel lesions and decay into dentine ) and D3 level (score  $\geq 4$ : obvious decay into dentine, excluding early lesions restricted to the enamel) were taken into account. The level of provided care has been approached through the restorative index ( $RI = (Ft / (D3 + Ft)) * 100$ ), with Ft standing for “filled teeth”, care index ( $CI = (Ft / (D3 + M + Ft)) * 100$ ) and treatment index ( $TI = ((M + F) / (D3 + M + Ft)) * 100$ ), all ranging from 0 to 100%. These indices can only be calculated for those children having a DMFT score > 0. For the other children (DMFT=0), it is mathematically impossible to calculate RI, CI and TI, since the formula should request to divide by “0”. Restorative and treatment index were also dichotomized to divide subjects into two groups: children without untreated caries (RI = 100%, TI=100%) and children with untreated caries (RI<100%, TI<100%).

1  
2  
3 Clinical amount of dental plaque was measured using the Plaque Index of Sillness and Løe  
4  
5 (11). This index calculates the mean buccal surface plaque score of six reference teeth on a  
6  
7 scale from 0 (no plaque) to 3 (visible plaque on more than one third of the buccal surface).  
8  
9

10 Both knowledge and attitude were assessed by a validated and reliable questionnaire,  
11  
12 answered by the children. A higher score out of ten correlates to more knowledge and a better  
13  
14 attitude. An expert panel tested the content validity of the items, after which the questionnaire  
15  
16 was pretested in a class of 25 primary school children (convenience sample) on two different  
17  
18 time points (test-retest). Internal consistency was analysed by means of the Cronbach's Alfa,  
19  
20 resulting in a score of 0.75, which fits into the required interval of  $0.70 < \text{Cronbach's}$   
21  
22  $\text{Alpha} < 0.90$ .  
23  
24  
25

26 To explore the impact of social environment on oral health and oral health related behaviour,  
27  
28 knowledge and attitude, a summary measure was used to characterize the deprivation level.  
29  
30 All parameters have been analysed in children eligible for the "Maximum Bill" for at least  
31  
32 one year between 2009 and 2013, compared to those who cannot take part of this system  
33  
34 (dichotomous explanatory variable). The Maximum Bill measure is automatically assigned to  
35  
36 individuals in order to reimburse medical costs exceeding a certain limit, based on income  
37  
38 levels. Accordingly, those who benefit from it correspond to underprivileged individuals.  
39  
40 Those without can be considered as middle and high-income subjects. The combined  
41  
42 questionnaire and oral health examination data were supplemented with the Intermutual  
43  
44 Agency (IMA) national database data on utilization of (oral) health care services, in order to  
45  
46 trace individuals who can make use of the Maximum Bill and to obtain information on  
47  
48 participants' frequency of utilization of oral health care services. This includes all attested  
49  
50 dental treatments and regular preventive dental check-ups over a period from 2009 to 2013.  
51  
52 By consensus, participants are considered as regular dental attenders if IMA database reported  
53  
54 at least one dental visit in three different years over a four-year period, excluding urgency  
55  
56  
57  
58  
59  
60



1  
2  
3 treatments. Subsequently, a dichotomous variable has been created to distinguish regular  
4  
5 dental attenders from non-regular dental attenders.  
6  
7

### 8 *Data analysis*

9  
10 Data analysis was carried out in the IBM SPSS Statistics V22.0 (SPSS Inc., Chicago, IL,  
11  
12 USA). Independent Sample T-test was used to compare underprivileged and more fortunate  
13  
14 individuals for their mean DMFT, DMFS, Plaque index, Care Index, Restorative Index,  
15  
16 Treatment Index, knowledge and attitude scores. A parametrical test was used, based on the  
17  
18 central limit theorem. Differences in proportions for dichotomous variables (RI100%,  
19  
20 TI100% and being a regular dental attender) have been compared in crosstabs, using a Chi  
21  
22 Square statistical test. Alpha was set at  $< 0.05$ .  
23  
24  
25

26  
27 The approach used to deal with uncomplete records and so to avoid bias, was to compare the  
28  
29 proportion of children eligible for the “Maximum Bill” in both responders and non-responders  
30  
31 (no clinical data available), by using the Chi Square statistical test. This social parameter  
32  
33 could be determined for all children by using the national registration number of the child and  
34  
35 the IMA database.  
36  
37

### 38 *Ethical aspects*

39  
40 The present study was approved by the Ethics Committee of the University Hospital Ghent  
41  
42 (2010/061). All parents signed an informed consent form prior to data collection. All schools  
43  
44 received information about the study protocol and agreed to participate. Children requiring  
45  
46 dental treatment or periodic recall were referred to the local dentist.  
47  
48  
49

## 50 **Results**

51  
52 Sample consisted of 2,216 Flemish primary school children with a mean age of 11.25 years  
53  
54 (SD 0.68). Data analysis was performed in 88.2% (n=1,954). Incomplete records were due to  
55  
56  
57  
58  
59  
60

1  
2  
3 failure to obtain consent and child's absence from school on the day of examination. From  
4  
5 these 1,954 children, 1,771 completed the questionnaire. Comparing the social status of  
6  
7 responders and non-responders, the proportion of children eligible for the 'Maximum Bill'  
8  
9 was equal for both groups (Chi Square Test;  $p=0.4$ ).  
10

11  
12 More than 19% ( $n=374$ ) of the children made use of the Maximum Bill. Being part of this  
13  
14 subgroup significantly affected oral health and oral health behaviour, as demonstrated in table  
15  
16 1. Underprivileged children showed worse outcomes for all explanatory variables. They had a  
17  
18 higher plaque index and higher DMFt and DMFs scores, both at D1 and D3 level. Overall  
19  
20 care level was significantly lower, resulting in a lower care index, treatment index and  
21  
22 restorative index. Both knowledge and attitude scores were slightly but significantly lower in  
23  
24 low-income children.  
25  
26

27  
28 Regarding the proportion of participants being completely treated for caries, underprivileged  
29  
30 children again differ from their more fortunate counterparts. According to table 2, 78.4% of  
31  
32 the low-income children were caries free ( $DMFT=0$ ), compared to 88.4% for the high income  
33  
34 group. From those having a  $DMFT>0$ , 55.3% of the Maximum Bill group children were  
35  
36 found to have a 100% Treatment index against 65.8% for children of higher social class. The  
37  
38 same trend appeared when comparing the 100% Restorative index, resulting in strongly  
39  
40 significant differences. Half of the low-income children (50.3%) could be considered as  
41  
42 regular dental attenders for the period between 2009 and 2013, whether 12.6% did not have  
43  
44 any dental visit during these five year period. Middle- and high-income children visited the  
45  
46 dentist on a more regular base, resulting in a 77.7% rate for regular dental attendance. Only  
47  
48 3.4% of these children did not report any dental visit. All of these differences proved to be  
49  
50 statistically significant.  
51  
52  
53  
54  
55  
56  
57  
58  
59  
60

## Discussion

Oral health inequalities are clearly visible within the present sample of primary school children. Since 2,216 subjects were randomly selected in 105 different primary schools in Flanders, results can be extrapolated to the entire Flemish region.

All included oral health parameters were strongly significantly affected by participants' social class. Not only caries experience, by means of DMFT and DMFs, proved to be higher in underprivileged groups, but also oral hygiene (plaque index) and the level of care seemed to depend on families' social context. This level of care was assessed by means of the restorative index, care index and treatment index. These indices could only be calculated for children having a DMFT > 0. This was mathematically declared in the methodological section, by explaining that it is impossible to divide by "0", which would be the case for those having a DMFT =0. Also clinically, this would be irrelevant, because the indices aim to calculate the proportion of the decayed teeth which have been restored or extracted. If there is no caries experience at all (DMFT=0), these indices are not applicable.

An arithmetic gap of 11.87, 8.34 and 9.96 emerges when comparing Care index, Treatment index and Restorative index for middle/high-income and low income children, in disadvantage of the latter group. The three indices do not all have the same meaning. Restorative index ( $RI = (Ft / (D3 + Ft)) * 100$ ) does not consider the missing teeth, because there can be doubts whether teeth were removed due to caries or due to other factors (trauma, periodontal infection). Care index ( $CI = (Ft / (D3 + M + Ft)) * 100$ ) partially involves the missing teeth, but the index does not consider a tooth extraction as a 'solution', but as part of the problem. Children are literally 'missing' a tooth, so tooth extraction it is seen as a 'lost chance'. On the other hand, Treatment Index ( $TI = ((M + F) / (D3 + M + Ft)) * 100$ ) proposes tooth extraction as part of the solution, because it removes a (potential) focus of infection. It gives

1  
2  
3 the same value to fillings and extractions. None of these indices can be considered as ‘all-  
4 embracing’, so it is good to compare them. When two subgroups differ significantly in  
5 restorative index, but not in treatment index, this means that one of the groups received more  
6 tooth extractions, which can be relevant to explore the severity of the disease and the way of  
7 treating it. The present findings suggest that the low-income children had more teeth being  
8 extracted, although it is hard to determine the clinical relevance of a 1% difference between  
9 treatment index and restorative index.  
10  
11  
12  
13  
14  
15  
16  
17  
18

19 Statistical analysis clearly demonstrates underprivileged children to visit less frequently the  
20 dental practitioner. One out of eight low-income children (12.6%) did not see a dentist one  
21 single time during the five years prior to data collection. This dental absenteeism is almost  
22 four times higher in underprivileged groups compared to the more fortunate subgroups.  
23  
24  
25  
26  
27  
28

29 The present Flemish/Belgian results on oral health inequalities are not a unique phenomenon,  
30 but are in accordance with global findings. International literature is overloaded with recent  
31 evidence demonstrating social inequalities in oral health. A systematic review by  
32 Schwendicke shows that low social class is associated with an increased risk of dental caries,  
33 especially in more developed countries (12). Childhood financial hardship not only has a main  
34 impact on individuals oral health during childhood, but also in later life. Poulton et al. (13)  
35 revealed that low childhood socio-economic status (SES) contributes to increased adult levels  
36 of caries and periodontal disease, even after adjusting for adult SES. Listl et al. (14)  
37 confirmed these findings, showing the long-term adverse effects of financial problems in  
38 childhood on oral health in middle and later adulthood.  
39  
40  
41  
42  
43  
44  
45  
46  
47  
48  
49  
50

51 The today's persistence of social inequalities, both in Flanders and in the entire world, is food  
52 for thought. From the most negative point of view, one could state that all previous oral health  
53 promotion campaigns, health promoting schools and governmental interventions simply failed  
54  
55  
56  
57  
58  
59  
60

1  
2  
3 to close the social gap in oral health. Unfortunately, the present cross-sectional survey is not  
4  
5 able to uncover a specific reason for this failure. What needs to be considered and further  
6  
7 investigated, is the key role played by the family and environmental context in children's  
8  
9 dental adherence. It is clear that 12-year old children cannot be taken fully responsible for  
10  
11 being a dental non-attender. A systematic review of Freire de Castilho (15) reveals that  
12  
13 parental oral health habits affects children's oral health. For this reason, the authors of this  
14  
15 review state that oral health promotion programs need to put emphasis on the entire family  
16  
17 context, concerning their lifestyle and oral health behaviour.  
18  
19

20  
21 Regarding the financial aspect, basic dental costs are completely reimbursed in Belgium for  
22  
23 all children under the age of 18 without distinction, so in fact differences in utilization of  
24  
25 health care services for financial reasons are not expected. However, in most dental practices,  
26  
27 the often high dental fee needs to be paid first by the client "out of pocket", to get it  
28  
29 reimbursed by the health insurance agency afterwards. Third party payment, in which the  
30  
31 health insurance agency pays the dental fee directly to the dental practitioner instead of the  
32  
33 client, is allowed for all minors, but not well established. Further, 37.36% of the Belgian  
34  
35 dentists did not take part in the fee convention, bearing a risk of potentially increased dental  
36  
37 costs. The authors cannot draw conclusions in this respect, but want to express the need to  
38  
39 determine the principal cause(s) of oral health inequalities. The specific provider payment  
40  
41 method can be one of the factors, but probably not the only one. Regarding knowledge and  
42  
43 attitude of the children in this study, there are statistically significant differences between both  
44  
45 social subgroups. However, a mean difference of 0.27 in attitude (on a score out of ten) might  
46  
47 be of little clinical relevance to explain the existing inequalities. For children's knowledge,  
48  
49 this gap is bigger, with a mean difference of 0.80 in knowledge scores. Differences in  
50  
51 knowledge and health literacy, attitude and lifestyle need further investigated, not only for  
52  
53 children, but also for the parents.  
54  
55  
56  
57  
58  
59  
60

1  
2  
3 Although oral health inequalities have always existed and are still remaining, society cannot  
4 simply acquiesce in its existence. Dental caries is largely preventable, but still remains the  
5 most prevalent chronic disease worldwide, mainly affecting high-risk subgroups (1,16).  
6  
7 Dental treatment is expensive, absorbing a considerable part of overall health care budget  
8 (17). Focussing on prevention and tackling oral health inequalities not only improve  
9 individuals' oral health and quality of life, but can also help in reducing governmental costs.  
10  
11 Watt et al. (18) call in the "London Charter on Oral Health Inequalities" for a more upstream  
12 public health approach, targeting the deeper social, political and economic causes of oral  
13 health inequalities. They advocate new multidisciplinary preventive strategies at local,  
14 regional, national and international levels, based on a common risk factor approach. Quoting  
15 the authors, "collaborative efforts among researchers, policy makers, public health  
16 practitioners, clinical teams, and the public are urgently required". So, decisions on oral health  
17 promotion and tackling oral health inequalities should not exclusively be made by  
18 policymakers, but also involve dentists and intermediate partner organizations.  
19  
20  
21  
22  
23  
24  
25  
26  
27  
28  
29  
30  
31  
32  
33

34  
35 The 'Marmot Review' (19) provides a guidance to assess the social gradient in health, by  
36 introducing the method of 'proportionate universalism'. Interventions don't need to focus  
37 only on the most disadvantaged individuals, but should be universal and contain a scale and  
38 intensity in accordance with subgroups' level of disadvantage.  
39  
40  
41  
42  
43

#### 44 **Strenghts and limitations**

##### 45 **Strenghts:**

46  
47  
48 The authors understand that the oral health status of Belgian children might be of less  
49 relevance in international literature. Although, this survey describes a very relevant theme:  
50 social inequalities in health. Off course, many other authors did research on this topic.  
51  
52 However, the present study certainly has an added value. What pleads in favour, is the large  
53  
54  
55  
56  
57  
58  
59  
60

1  
2  
3 sample of children with the same age, but more important, the objective and reliable link that  
4  
5 was provided between children's oral health, their social status and their oral health care  
6  
7 utilization. Oral health was investigated by calibrated and blinded dentists. Afterwards, these  
8  
9 findings were linked to people's social class, not by interviewing the patients or their parents,  
10  
11 but by exploring data of the national health institute. In this way, dental examiners were  
12  
13 blinded, and people could not 'hide' their social status for the researchers. Furthermore, the  
14  
15 same database revealed the most reliable information on oral health care utilization. Mostly,  
16  
17 dental attendance is assessed by means of a questionnaire, inevitably leading to bias. In this  
18  
19 survey, every single dental visit of a child could be linked to its corresponding record. It is  
20  
21 obvious that this kind of survey requires a strict procedure, to ensure children's medical data  
22  
23 and privacy. Because of the sensitive character of the information, studies with the same  
24  
25 setting are very rare. A short literature search on Pubmed with the following string "Oral  
26  
27 Health"[Mesh] AND "health care utilization"[All Fields]" resulted in only 7 hits. Two  
28  
29 Nigerian surveys reported on almost the same subject, but both of them used a self-  
30  
31 administered questionnaire (20-21).  
32  
33  
34  
35  
36

### 37 **Limitations:**

38  
39  
40 The authors also have to report some limitations of the study. Although oral health figures can  
41  
42 be comparable with other western countries, the present sample only included Belgian  
43  
44 subjects. Further, the cross-sectional study design does not allow the authors to identify  
45  
46 specific causes for inequalities in oral health and dental non-attendance, only associations.  
47  
48

49  
50 Since Glimlachen.be® is a four-year longitudinal program visiting schools, most of the  
51  
52 subjects will have received previous dental screenings before the present data collection.  
53

54 These screenings might have positively influenced the oral health and oral health behaviour of  
55  
56  
57  
58  
59  
60

1  
2  
3 all children, resulting in an underestimation of oral health related problems. However, this  
4  
5 influence should be equal for both compared groups.  
6  
7

## 8 **Conclusion**

9  
10 Oral health inequalities are an undeniable reality in primary school children in  
11  
12 Flanders/Belgium. Oral health, oral hygiene, oral health care level and dental attendance  
13  
14 patterns are negatively affected by children's social class.  
15  
16

## 17 **Acknowledgement**

18  
19 The research presented in this report is part of the 'Glimlachen.be' project  
20  
21 ([www.glimlachen.be](http://www.glimlachen.be)), commissioned and financed by the 'Insurance Committee for Health  
22  
23 Care' of the 'Belgian National Institute for Health and Disability Insurance'.  
24  
25  
26

27  
28 The authors thank the Flemish Dental Association (VVT), the dentist examiners and dental  
29  
30 assistants and the school for their collaboration. All authors do not declare any potential  
31  
32 conflict of interest.  
33  
34

## 35 **Contributorship statement**

36  
37 All authors declare to have had substantial contributions to the conception and design of the  
38  
39 work, to have drafted and revised the work for important intellectual content. All authors gave  
40  
41 final approval of the version to be published; and agreement to be accountable for all aspects  
42  
43 of the work.  
44  
45  
46

47  
48 The corresponding author is drs. Martijn Lambert, dentist and researcher of Ghent University,  
49  
50 department of Community Dentistry and Oral Public Health. His task was to analyze data and  
51  
52 write the present article. Prof. Dr. J. Vanobbergen, Prof. Dr. L. De Visschere and Prof. Dr. L.  
53  
54 Martens are the PhD supervisors of drs. Lambert. They are all participating in the  
55  
56 'Glimlachen.be' project from its very beginning. In that way, they could provide essential  
57  
58  
59  
60



1  
2  
3 information on data collection procedure and other methodological aspects of the present  
4  
5 study. Their expertise was indispensable to realize this publication.  
6  
7

### 8 **Competing interests**

9  
10  
11 All co-authors declare no competing interests  
12

### 13 **Funding**

14  
15  
16  
17 There was no funding to analyze data or to report this paper. The only funding corresponds to  
18  
19 data collection (see acknowledgement).  
20  
21

### 22 **Data sharing statement**

23  
24  
25 Patient leveled data or full data set and statistical code book are available from the  
26  
27 corresponding author on request.  
28  
29  
30  
31  
32  
33  
34  
35  
36  
37  
38  
39  
40  
41  
42  
43  
44  
45  
46  
47  
48  
49  
50  
51  
52  
53  
54  
55  
56  
57  
58  
59  
60

## References

1. Marcenes W, Kassebaum NJ, Bernabe E, et al. Global burden of oral conditions in 1990-2010: a systematic analysis. *J Dent Res* 2013;92(7):592-597.
2. Edelstein BL. Pediatric caries worldwide: implications for oral hygiene products. *Compend Contin Educ Dent* 2005;26(5 Suppl 1):4-9.
3. Moynihan P. Sugars and Dental Caries: Evidence for Setting a Recommended Threshold for Intake. *Adv Nutr* 2016;15;7(1):149-56. DOI: 10.3945/an.115.009365.
4. Chaves SC, Vieira-da-Silva LM. Anticaries effectiveness of fluoride toothpaste: a meta-analysis. *Rev Saude Publica* 2002;36(5):598-606.
5. Van den Branden S, Van den Broucke S, Leroy R, et al. Oral health and oral health-related behaviour in preschool children: evidence for a social gradient. *Eur J Pediatr* 2013;172:231-37.
6. Declerck D, Leroy R, Martens L, et al. Factors associated with prevalence and severity of caries experience in preschool children. *Community Dent Oral Epidemiol* 2008;36:168-178.
7. Do LG. Distribution of Caries in children: variations between and within populations. *J Dent Res* 2012;91(6):536-543.
8. Willems S, Vanobbergen J, Martens L, et al. The independent impact of Household- and neighbourhood-based social determinants on Early Childhood Caries. *Fam Community Health* 2005;28:168-175.
9. Vanobbergen JN, Martens LC, Lesaffre E, et al. Parental occupational status related to dental caries experience in 7-year-old children in Flanders (Belgium). *Community Dent Health* 2001;18(4):256-262.

- 1  
2  
3 10. Listl S, Moeller J, Manski R. A multi-country comparison of reasons for dental non-  
4 attendance. *Eur J Oral Sci* 2014;122(1):62-9.  
5  
6  
7  
8 11. Løe H. The Gingival Index, the Plaque Index, and the Retention Index Systems. *J*  
9 *Periodontol* 1967;38:610-616.  
10  
11  
12  
13 12. Schwendicke F, Dörfer CE, Schlattmann P, et al. Socio-economic inequality and caries: a  
14 systematic review and meta-analysis. *J Dent Res* 2015;94(1):10-18.  
15  
16  
17  
18 13. Poulton R, Caspi A, Milne BJ, et al. Association between children's experience of socio-  
19 economic disadvantage and adult health: a life-course study. *The Lancet*  
20 2002;360(9346):1640-1645.  
21  
22  
23  
24  
25  
26 14. Listl S, Watt RG, Tsakos G. Early Life Conditions, Adverse Life Events, and Chewing  
27 Ability at Middle and Later Adulthood. *Am J Public Health* 2014;104:55-61.  
28  
29  
30  
31 15. Freire de Castilho AR, Mialhe FL, de Souza Barbosa T, et al. Influence of family  
32 environment on children's oral health: a systematic review. *J Pediatr (Rio J)*  
33 2013;89(2):116-123.  
34  
35  
36  
37  
38 16. Kassebaum NJ, Bernabé E, Dahiya M. Global Burden of Untreated Caries: A Systematic  
39 Review and Metaregression. *J Dent Res* 2015;94(5) 650-658.  
40  
41  
42  
43 DOI:10.1177/0022034515573272  
44  
45  
46 17. Listl S, Galloway J, Mossey PA. Global economic impact of dental diseases. *J Dent Res*  
47 2015;94(10):1355-1361.  
48  
49  
50  
51 18. Watt RG, Heilmann A, Listl S, Peres MA. London Charter on Oral Health Inequalities. *J*  
52 *Dent Res* 2015;1-3. DOI: 10.1177/0022034515622198  
53  
54  
55  
56  
57  
58  
59  
60

- 1  
2  
3 19. Marmot M et al. Fair society, healthy lives: The Marmot review, executive summary  
4  
5 [Internet]. London: The Marmot Review. Februari 2010; ISBN 978-0-9564870-0-1:  
6  
7 <http://www.instituteofhealthequity.org/projects/fair-society-healthy-lives-the-marmot-review>  
8  
9  
10 20. Onyejaka NK, Folayan MO, Folaranmi N. Barriers and facilitators of dental service  
11  
12 utilization by children aged 8 to 11 years in Enugu State, Nigeria. *BMC Health Serv Res* 2016  
13  
14 Mar 15;16:93. doi: 10.1186/s12913-016-1341-6.  
15  
16  
17 21. Ajayi DM, Arigbede AO. Barriers to oral health care utilization in Ibadan, South West  
18  
19 Nigeria. *Afr Health Sci* 2012 Dec;12(4):507-13.  
20  
21  
22  
23  
24  
25  
26  
27  
28  
29  
30  
31  
32  
33  
34  
35  
36  
37  
38  
39  
40  
41  
42  
43  
44  
45  
46  
47  
48  
49  
50  
51  
52  
53  
54  
55  
56  
57  
58  
59  
60

Table 1: Oral health and oral health behaviour between children from low income (utilizing the 'Maximum Bill') and middle-to-high income families.

|                                            | Maximum Bill | N    | Mean  | SD    | Mean diff. | 95%CI          | p-value          |
|--------------------------------------------|--------------|------|-------|-------|------------|----------------|------------------|
| <b>Mean Plaque index</b><br>(missing = 1)  | No           | 1602 | 0.41  | 0.48  | -0.17      | [-0.23; -0.12] | <b>&lt;0.001</b> |
|                                            | Yes          | 351  | 0.59  | 0.58  |            |                |                  |
| <b>DMFt (D1-level)</b><br>(missing = 1)    | No           | 1601 | 1.68  | 2.05  | -1.12      | [-1.36; -0.87] | <b>&lt;0.001</b> |
|                                            | Yes          | 352  | 2.79  | 2.43  |            |                |                  |
| <b>DMFt (D3-level)</b><br>(missing = 2)    | No           | 1600 | 0.78  | 1.42  | -0.47      | [-0.64; -0.30] | <b>&lt;0.001</b> |
|                                            | Yes          | 352  | 1.25  | 1.68  |            |                |                  |
| <b>DMFs (D1-level)</b><br>(missing = 0)    | No           | 1602 | 2.30  | 3.25  | -1.72      | [-2.11; -1.32] | <b>&lt;0.001</b> |
|                                            | Yes          | 352  | 4.02  | 4.07  |            |                |                  |
| <b>DMFs (D3-level)</b><br>(missing = 0)    | No           | 1602 | 1.18  | 2.51  | -0.83      | [-1.13; -0.52] | <b>&lt;0.001</b> |
|                                            | Yes          | 352  | 2.00  | 3.16  |            |                |                  |
| <b>Care index*</b><br>(missing = 0)        | No           | 544  | 70.33 | 42.14 | 11.87      | [4.47; 19.27]  | <b>&lt;0.001</b> |
|                                            | Yes          | 170  | 58.46 | 45.17 |            |                |                  |
| <b>Treatment index*</b><br>(missing = 0)   | No           | 544  | 73.13 | 40.83 | 8.34       | [1.18; 15.51]  | <b>0.02</b>      |
|                                            | Yes          | 170  | 64.79 | 43.75 |            |                |                  |
| <b>Restorative index*</b><br>(missing = 0) | No           | 537  | 72.18 | 41.57 | 9.96       | [2.54; 17.38]  | <b>0.01</b>      |
|                                            | Yes          | 164  | 62.22 | 44.79 |            |                |                  |
| <b>Knowledge</b><br>(missing = 183)        | No           | 1483 | 7.58  | 2.12  | 0.80       | [0.52; 1.07]   | <b>&lt;0.001</b> |
|                                            | Yes          | 288  | 6.78  | 2.49  |            |                |                  |
| <b>Attitude</b><br>(missing = 183)         | No           | 1482 | 8.37  | 1.32  | 0.27       | [0.10; 0.44]   | <b>0.002</b>     |
|                                            | Yes          | 289  | 8.10  | 1.44  |            |                |                  |

\*of those having DMFt>0

Table 2: Dental Compliance and Caries Free proportions between children from low income (using the "Maximum Bill") and middle-to-high income families

| Variable                                 | Maximum Bill   |               | p-value          |
|------------------------------------------|----------------|---------------|------------------|
|                                          | No             | Yes           |                  |
| Treatment index (TI=100%) <sup>^</sup>   | 65.8% (n=358)  | 55.3% (n=94)  | <b>0.01</b>      |
| Restorative index (RI=100%) <sup>^</sup> | 65.4% (n=351)  | 53.7% (n=88)  | <b>0.008</b>     |
| Regular dental attender*                 | 77.7% (n=1344) | 50.3% (n=188) | <b>&lt;0.001</b> |
| No dental visit between 2009 and 2013    | 3.4% (n=59)    | 12.6% (n=47)  | <b>&lt;0.001</b> |
| Caries free proportion                   | 88.4% (n=1414) | 78.4% (n=276) | <b>&lt;0.001</b> |

<sup>^</sup> Dichotomous explanatory variable

\* at least one dental visit in three different years over a four-year period, excluding urgency treatments

## STROBE Statement—checklist of items that should be included in reports of observational studies

|                              | Item No | Recommendation                                                                                                                                                                                                                                                                                                                                                                                                                                                                                                                                                                                                                                                                                                 |
|------------------------------|---------|----------------------------------------------------------------------------------------------------------------------------------------------------------------------------------------------------------------------------------------------------------------------------------------------------------------------------------------------------------------------------------------------------------------------------------------------------------------------------------------------------------------------------------------------------------------------------------------------------------------------------------------------------------------------------------------------------------------|
| <b>Title and abstract</b>    | 1       | (a) Indicate the study's design with a commonly used term in the title or the abstract<br><b>Cross-sectional survey (title page)</b><br>(b) Provide in the abstract an informative and balanced summary of what was done and what was found<br><b>Page 2</b>                                                                                                                                                                                                                                                                                                                                                                                                                                                   |
| <b>Introduction</b>          |         |                                                                                                                                                                                                                                                                                                                                                                                                                                                                                                                                                                                                                                                                                                                |
| Background/rationale         | 2       | Explain the scientific background and rationale for the investigation being reported<br><b>Background (page 4)</b>                                                                                                                                                                                                                                                                                                                                                                                                                                                                                                                                                                                             |
| Objectives                   | 3       | State specific objectives, including any prespecified hypotheses<br><b>Objectives (page 5)</b>                                                                                                                                                                                                                                                                                                                                                                                                                                                                                                                                                                                                                 |
| <b>Methods</b>               |         |                                                                                                                                                                                                                                                                                                                                                                                                                                                                                                                                                                                                                                                                                                                |
| Study design                 | 4       | Present key elements of study design early in the paper<br><b>Page 6</b>                                                                                                                                                                                                                                                                                                                                                                                                                                                                                                                                                                                                                                       |
| Setting                      | 5       | Describe the setting, locations, and relevant dates, including periods of recruitment, exposure, follow-up, and data collection<br><b>Page 6</b>                                                                                                                                                                                                                                                                                                                                                                                                                                                                                                                                                               |
| Participants                 | 6       | (a) <i>Cohort study</i> —Give the eligibility criteria, and the sources and methods of selection of participants. Describe methods of follow-up<br><i>Case-control study</i> —Give the eligibility criteria, and the sources and methods of case ascertainment and control selection. Give the rationale for the choice of cases and controls<br><i>Cross-sectional study</i> —Give the eligibility criteria, and the sources and methods of selection of participants <b>Page 6</b><br>(b) <i>Cohort study</i> —For matched studies, give matching criteria and number of exposed and unexposed<br><i>Case-control study</i> —For matched studies, give matching criteria and the number of controls per case |
| Variables                    | 7       | Clearly define all outcomes, exposures, predictors, potential confounders, and effect modifiers. Give diagnostic criteria, if applicable <b>Data collection (page 6-7)</b>                                                                                                                                                                                                                                                                                                                                                                                                                                                                                                                                     |
| Data sources/<br>measurement | 8*      | For each variable of interest, give sources of data and details of methods of assessment (measurement). Describe comparability of assessment methods if there is more than one group <b>(Page 7)</b>                                                                                                                                                                                                                                                                                                                                                                                                                                                                                                           |
| Bias                         | 9       | Describe any efforts to address potential sources of bias <b>Calibration of examiners (Page 6-7)</b>                                                                                                                                                                                                                                                                                                                                                                                                                                                                                                                                                                                                           |
| Study size                   | 10      | Explain how the study size was arrived at <b>Study design, settings and population (Page 6)</b>                                                                                                                                                                                                                                                                                                                                                                                                                                                                                                                                                                                                                |
| Quantitative variables       | 11      | Explain how quantitative variables were handled in the analyses. If applicable, describe which groupings were chosen and why <b>Page 7-8</b>                                                                                                                                                                                                                                                                                                                                                                                                                                                                                                                                                                   |
| Statistical methods          | 12      | (a) Describe all statistical methods, including those used to control for confounding<br><b>Data analysis (page 8)</b><br>(b) Describe any methods used to examine subgroups and interactions<br><b>Page 8</b><br>(c) Explain how missing data were addressed <b>Page 9</b>                                                                                                                                                                                                                                                                                                                                                                                                                                    |

---

(d) *Cohort study*—If applicable, explain how loss to follow-up was addressed

*Case-control study*—If applicable, explain how matching of cases and controls was addressed

*Cross-sectional study*—If applicable, describe analytical methods taking account of sampling strategy **Page 6**

---

(e) Describe any sensitivity analyses **Not applicable**

Continued on next page

For peer review only



**Results**

|                  |     |                                                                                                                                                                                                                                                                                                                                                                                                                                                              |
|------------------|-----|--------------------------------------------------------------------------------------------------------------------------------------------------------------------------------------------------------------------------------------------------------------------------------------------------------------------------------------------------------------------------------------------------------------------------------------------------------------|
| Participants     | 13* | (a) Report numbers of individuals at each stage of study—eg numbers potentially eligible, examined for eligibility, confirmed eligible, included in the study, completing follow-up, and analysed <b>Page 9</b><br>(b) Give reasons for non-participation at each stage <b>Page 10</b><br>(c) Consider use of a flow diagram <b>Not applicable (cross-sectional design)</b>                                                                                  |
| Descriptive data | 14* | (a) Give characteristics of study participants (eg demographic, clinical, social) and information on exposures and potential confounders <b>Page 10</b><br>(b) Indicate number of participants with missing data for each variable of interest <b>Table 1 (Page 18)</b><br>(c) <i>Cohort study</i> —Summarise follow-up time (eg, average and total amount)                                                                                                  |
| Outcome data     | 15* | <i>Cohort study</i> —Report numbers of outcome events or summary measures over time<br><i>Case-control study</i> —Report numbers in each exposure category, or summary measures of exposure<br><i>Cross-sectional study</i> —Report numbers of outcome events or summary measures<br><b>Tables page 17-18</b>                                                                                                                                                |
| Main results     | 16  | (a) Give unadjusted estimates and, if applicable, confounder-adjusted estimates and their precision (eg, 95% confidence interval). Make clear which confounders were adjusted for and why they were included<br>(b) Report category boundaries when continuous variables were categorized <b>Table 2 (Page 19)</b><br>(c) If relevant, consider translating estimates of relative risk into absolute risk for a meaningful time period <b>Not applicable</b> |
| Other analyses   | 17  | Report other analyses done—eg analyses of subgroups and interactions, and sensitivity analyses <b>Not applicable</b>                                                                                                                                                                                                                                                                                                                                         |

**Discussion**

|                  |    |                                                                                                                                                                                                         |
|------------------|----|---------------------------------------------------------------------------------------------------------------------------------------------------------------------------------------------------------|
| Key results      | 18 | Summarise key results with reference to study objectives <b>Page 10</b>                                                                                                                                 |
| Limitations      | 19 | Discuss limitations of the study, taking into account sources of potential bias or imprecision. Discuss both direction and magnitude of any potential bias<br><b>Strengths and limitations (page 3)</b> |
| Interpretation   | 20 | Give a cautious overall interpretation of results considering objectives, limitations, multiplicity of analyses, results from similar studies, and other relevant evidence<br><b>Page 10-11</b>         |
| Generalisability | 21 | Discuss the generalisability (external validity) of the study results<br><b>Page 10</b>                                                                                                                 |

**Other information**

|         |    |                                                                                                                                                                                                   |
|---------|----|---------------------------------------------------------------------------------------------------------------------------------------------------------------------------------------------------|
| Funding | 22 | Give the source of funding and the role of the funders for the present study and, if applicable, for the original study on which the present article is based<br><b>Acknowledgement (page 13)</b> |
|---------|----|---------------------------------------------------------------------------------------------------------------------------------------------------------------------------------------------------|

\*Give information separately for cases and controls in case-control studies and, if applicable, for exposed and unexposed groups in cohort and cross-sectional studies.

**Note:** An Explanation and Elaboration article discusses each checklist item and gives methodological background and published examples of transparent reporting. The STROBE checklist is best used in conjunction with this article (freely available on the Web sites of PLoS Medicine at <http://www.plosmedicine.org/>, Annals of Internal Medicine at

1  
2 <http://www.annals.org/>, and Epidemiology at <http://www.epidem.com/>). Information on the STROBE Initiative is  
3 available at [www.strobe-statement.org](http://www.strobe-statement.org).  
4  
5  
6  
7  
8  
9  
10  
11  
12  
13  
14  
15  
16  
17  
18  
19  
20  
21  
22  
23  
24  
25  
26  
27  
28  
29  
30  
31  
32  
33  
34  
35  
36  
37  
38  
39  
40  
41  
42  
43  
44  
45  
46  
47  
48  
49  
50  
51  
52  
53  
54  
55  
56  
57  
58  
59  
60

# BMJ Open

## Socioeconomic inequalities in caries experience, care level and dental attendance in primary school children in Belgium: a cross-sectional survey

|                                 |                                                                                                                                                                                                                                 |
|---------------------------------|---------------------------------------------------------------------------------------------------------------------------------------------------------------------------------------------------------------------------------|
| Journal:                        | <i>BMJ Open</i>                                                                                                                                                                                                                 |
| Manuscript ID                   | bmjopen-2016-015042.R2                                                                                                                                                                                                          |
| Article Type:                   | Research                                                                                                                                                                                                                        |
| Date Submitted by the Author:   | 01-Jun-2017                                                                                                                                                                                                                     |
| Complete List of Authors:       | Lambert, Martijn; Universiteit Gent, Dentistry<br>Vanobbergen, Jacques; Universiteit Gent, Dentistry<br>Martens, Luc; Universiteit Gent, Dentistry<br>De Visschere, Luc; Univ Ghent, Community Dentistry and Oral Public Health |
| <b>Primary Subject Heading</b>: | Dentistry and oral medicine                                                                                                                                                                                                     |
| Secondary Subject Heading:      | Public health, Epidemiology                                                                                                                                                                                                     |
| Keywords:                       | EPIDEMIOLOGY, ORAL MEDICINE, Community child health < PAEDIATRICS, PUBLIC HEALTH                                                                                                                                                |
|                                 |                                                                                                                                                                                                                                 |

SCHOLARONE™  
Manuscripts

1  
2  
3 **Socioeconomic inequalities in caries experience, care level and dental**  
4 **attendance in primary school children in Belgium: a cross-sectional survey**  
5  
6

7  
8 Martijn J. Lambert<sup>1</sup>, Jacques SN Vanobbergen<sup>2</sup>, Luc C. Martens<sup>3</sup>, Luc M.J. De Visschere<sup>4</sup>  
9

10  
11 1drs., Department of Community Dentistry and Oral Public Health, Dental School, Ghent  
12 University, 185, De Pintelaan, 9000 Ghent, Belgium  
13

14  
15  
16 2 MSD PhD, Department of Community Dentistry and Oral Public Health, Dental School,  
17 Ghent University, 185, De Pintelaan, 9000 Ghent, Belgium  
18

19  
20  
21 3MSD PhD, Chair of Dept Paediatric Dentistry and Special Care, Paecomedis research  
22 cluster, Dental School, Ghent University, 185, De Pintelaan, 9000 Ghent, Belgium  
23

24  
25  
26 4MSD PhD, Department of Community Dentistry and Oral Public Health, Dental School,  
27 Ghent University, 185, De Pintelaan, 9000 Ghent, Belgium  
28

29 Author address:  
30

31  
32  
33  
34  
35 drs. Martijn Lambert  
36

37  
38 Department of Community Dentistry  
39

40  
41 Dental School Ghent University  
42

43  
44 De Pintelaan 185, 9000 Gent (Belgium)  
45

46  
47 0032 494 89 64 42  
48

49  
50 email: [lambert\\_martijn@hotmail.com](mailto:lambert_martijn@hotmail.com)  
51

52  
53 word count: 4,389  
54  
55  
56  
57  
58  
59  
60

## Abstract

Objectives: Oral health inequality in children is a widespread and well-documented problem in oral health care. However, objective and reliable methods to determine these inequalities in all oral health aspects, including both dental attendance and oral health, are rather scarce.

Aims: to explore oral health inequalities and to assess the impact of socio-economic factors on oral health, oral health behaviour and dental compliance of primary schoolchildren.

Methods: Data collection was executed in 2014 within a sample of 2,216 children in 105 primary schools in Flanders, by means of an oral examination and a validated questionnaire. Intermutual Agency database was consulted to objectively determine individuals' social state and frequency of utilization of oral health care services. Underprivileged children were compared to more fortunate children for their mean DMFt, DMFs, Plaque index, Care Index (CI), Restorative Index (RI), Treatment Index (TI), knowledge and attitude. Differences in proportions for dichotomous variables (RI100%, TI100% and being a regular dental attender) were analysed. The present study was approved by the Ethics Committee of the University Hospital Ghent (2010/061). All parents signed an informed consent form prior to data collection. All schools received information about the study protocol and agreed to participate. Children requiring dental treatment or periodic recall were referred to the local dentist.

Results: Underprivileged children had higher D1MFT (95%CI [0.87-1.36]), D3MT (95%CI [0.30-0.64]) and plaque scores (95%CI [0.12-0.23]), and lower care level ( $p < 0.02$ ). In the low-income group, 78.4% was caries free, compared to 88.4% for the other children. Half of the low-income children could be considered as regular dental attenders, whether 12.6% did not have any dental visit during a five year period.

1  
2  
3 Conclusion: Oral health, oral hygiene, oral health care level and dental attendance patterns are  
4 negatively affected by children's social class, leading to oral health inequalities in Belgian  
5 primary school children.  
6  
7  
8  
9

## 10 11 12 13 **Introduction**

### 14 15 *Background*

16  
17 Although dental caries is largely preventable, it is a major public health problem, since  
18 untreated tooth decay remains by far the most common chronic disease worldwide (1).  
19 International data on childhood caries epidemiology confirm that dental caries remains a  
20 'significant and consequential disease of childhood', being increasingly localized in a  
21 subgroup of high-risk children, both in developing and developed countries (2).  
22  
23

24  
25 Dental caries is a multifactorial disease. Consumption of sugary substances and poor oral  
26 health practices largely affect the occurrence of tooth decay. Literature provides powerful  
27 evidence that dental caries is positively correlated to sugar intake (3) and adversely correlated  
28 to tooth brushing with a fluoridated toothpaste (4). However, all dietary and behavioural  
29 determinants of caries are influenced by people's social context, resulting in worsened oral  
30 health outcomes in underprivileged groups. Socio-economic inequalities in pre-school  
31 children have already been reported nationally and internationally. Van den Branden not only  
32 highlights the occurrence of early childhood caries in preschool children (3-5 years old), but  
33 also provides some evidence that a social gradient in early childhood caries can be suggested  
34 (5). This confirms results from earlier national reports and is consistent with international  
35 literature (2,6,7,8). For the Belgian situation however, the mentioned national reports only  
36 include preschool children. Recent data from children attending school are scarce, but  
37 certainly needed (9).  
38  
39  
40  
41  
42  
43  
44  
45  
46  
47  
48  
49  
50  
51  
52  
53  
54  
55  
56  
57  
58  
59  
60

1  
2  
3 The occurrence of dental caries and other oral diseases is not the only domain in which  
4 inequalities appear. Use of oral health care facilities and regular preventive dental check-up  
5 are also affected by social variables. In adulthood, it is clear that dental non-attenders rank  
6 significantly more often at the lower end of the socioeconomic scale (10). Regarding the  
7 financial aspect of oral health care in Belgium a fee-for-service payment method is used,  
8 combined with a compulsory health insurance. In this system a patient pays the entire dental  
9 visit cost to the dentist at first hand, in order to recover at second hand the biggest part of this  
10 sum from his health insurance agency. To reduce inequalities in (oral) health, some national  
11 government initiatives have been implemented. Underprivileged individuals can be entitled to  
12 an increased allowance for health care interventions when the family income is low. In case of  
13 excessive medical costs, people can also have access to the mechanism known as the  
14 “Maximum Bill”, calculating a cost limit for medical care for every individual. The higher the  
15 family income, the higher the cost limit. When medical costs exceed this limit, they will be  
16 entirely and automatically reimbursed. Furthermore, a full coverage of regular treatment costs  
17 for all children under the age of 18 is guaranteed, provided that the dentist acceded to the  
18 convention between the national health insurance agency and dental professional  
19 organisations. For 2015-2016 period, 62.64% of Belgian dentists partially or completely took  
20 part in this convention.  
21  
22  
23  
24  
25  
26  
27  
28  
29  
30  
31  
32  
33  
34  
35  
36  
37  
38  
39  
40  
41  
42

#### 43 *Objectives*

44  
45  
46 Objective data on children’s dental non-attendance and health consumption are scarce, not  
47 only in Belgium, but worldwide. By involving the Intermutual Agency (IMA) national  
48 database data on utilization of (oral) health care services, this article provides objective  
49 information on oral health consumption and dental attendance.  
50  
51  
52  
53  
54  
55  
56  
57  
58  
59  
60

1  
2  
3 In this study the authors aimed to explore existing oral health inequalities and to assess the  
4 impact of socio-economic factors on oral health, oral health behaviour and dental compliance  
5 of primary schoolchildren.  
6  
7  
8  
9

## 10 11 12 13 14 15 16 **Materials and methods**

### 17 *Study design, settings and population*

18  
19  
20 The present survey fits into the context of Glimlachen.be®, a prospective four-year  
21 longitudinal oral health promotion program, visiting primary schools in Flanders (Belgium)  
22 with a mobile dental unit. It is conducted by dentists of the Flemish Dental Association under  
23 the authority of the National Institute for Health and Disability Insurance (NIHDI).  
24  
25  
26  
27  
28  
29  
30  
31

32 The present cross-sectional study reports on the oral health condition of children in the last  
33 year of primary school, recruited in all schools in Flanders within the three educational  
34 networks (GO – publicly run under the authority of the Flemish Community (15%); OGO  
35 publicly funded and publicly run by local authorities or provincial authorities (15%; VGO  
36 publicly funded and privately run by private non-profit-making organisations, mainly catholic  
37 schools (70%)).  
38  
39  
40  
41  
42  
43  
44  
45

46 Data were collected in 2014 from a representative sample of 2,216 primary school children in  
47 105 different schools in Flanders. The total study population is estimated to be about 68000  
48 children in 2340 schools. Schools were randomly selected, based on a two-step stratification.  
49 In the first step, a stratified randomisation was executed at school-level, based on three strata:  
50 number of pupils, region and educational network. In the next step, randomisation occurred at  
51 the individual level. There was an oversampling of 2% for schools with assistance from  
52  
53  
54  
55  
56  
57  
58  
59  
60



1  
2  
3 special education for disabled children or children with learning or educational difficulties.  
4  
5 The sample size was determined based on a confidence level of 95% and a margin of error of  
6  
7 2.5%. There were several sample size estimations, depending on the variability of the  
8  
9 different outcome variables. The authors decided to include as many children as practically  
10  
11 possible, based on the availability of three mobile dental units and the number of school days.  
12  
13

### 14 15 16 17 18 *Data collection* 19

20  
21 In all participants, oral health condition was recorded by visual inspection with a mobile  
22  
23 dental unit in school premises by 44 well-trained and calibrated dentist-examiners. All  
24  
25 examiners were blinded to the socioeconomic status of the children they examined.  
26  
27 Calibration was undertaken to avoid bias, using a series of full-mouth photographs simulating  
28  
29 the clinical examination of patients, set up in a PowerPoint presentation. Intra Class  
30  
31 Correlation Coefficient (ICC) for all examiners was 0.86 with a 95% confidence interval of  
32  
33 0.82 to 0.90. General kappa score was 0.72.  
34  
35

36  
37 Individual children have been examined for several oral health parameters. DMFT was used  
38  
39 as outcome variable to count the number of decayed (D), missing (M) and filled (F) teeth.  
40  
41 Caries detection was based on the International Caries Detection and Assessment System  
42  
43 (ICDAS), using six subcategories of caries going from first visible change in enamel (score 1)  
44  
45 to extensive cavity with visible dentin possibly reaching the pulp (score 6). Both caries at D1  
46  
47 level (score > 0: early enamel lesions and decay into dentine ) and D3 level (score  $\geq$ 4: obvious  
48  
49 decay into dentine, excluding early lesions restricted to the enamel) were taken into account.  
50  
51 The level of provided care has been approached through the restorative index (RI=  
52  
53  $(Ft/(D3+Ft)) * 100$ ), with Ft standing for “filled teeth”, care index (CI=  $(Ft/(D3+M+Ft))*100$ )  
54  
55 and treatment index (TI=  $((M+Ft)/(D3+M+Ft))*100$ ), all ranging from 0 to 100%. These  
56  
57  
58  
59  
60

1  
2  
3 indices can only be calculated for those children having a DMFT score  $> 0$ . For the other  
4  
5 children (DMFT=0), it is mathematically impossible to calculate RI, CI and TI, since the  
6  
7 formula should request to divide by "0". Restorative and treatment index were also  
8  
9 dichotomized to divide subjects into two groups: children without untreated caries (RI =  
10  
11 100%, TI=100%) and children with untreated caries (RI<100%, TI<100%).  
12  
13

14  
15 Clinical amount of dental plaque was measured using the Plaque Index of Sillness and Loe  
16  
17 (11). This index calculates the mean buccal surface plaque score of six reference teeth on a  
18  
19 scale from 0 (no plaque) to 3 (visible plaque on more than one third of the buccal surface).  
20  
21

22  
23 Both knowledge and attitude were assessed by a validated and reliable questionnaire,  
24  
25 answered by the children. A higher score out of ten correlates to more knowledge and a better  
26  
27 attitude. An expert panel tested the content validity of the items, after which the questionnaire  
28  
29 was pretested in a class of 25 primary school children (convenience sample) on two different  
30  
31 time points (test-retest). Internal consistency was analysed by means of the Cronbach's Alfa,  
32  
33 resulting in a score of 0.75, which fits into the required interval of  $0.70 < \text{Cronbach's}$   
34  
35  $\text{Alpha} < 0.90$ .  
36  
37

38  
39 To explore the impact of social environment on oral health and oral health related behaviour,  
40  
41 knowledge and attitude, a summary measure was used to characterize the deprivation level.  
42  
43 All parameters have been analysed in children eligible for the "Maximum Bill" for at least  
44  
45 one year between 2009 and 2013, compared to those who cannot take part of this system  
46  
47 (dichotomous explanatory variable). The Maximum Bill measure is automatically assigned to  
48  
49 individuals in order to reimburse medical costs exceeding a certain limit, based on income  
50  
51 levels. Accordingly, those who benefit from it correspond to underprivileged individuals.  
52  
53 Those without can be considered as middle and high-income subjects. The combined  
54  
55 questionnaire and oral health examination data were supplemented with the Intermutual  
56  
57  
58  
59  
60

1  
2  
3 Agency (IMA) national database data on utilization of (oral) health care services, in order to  
4 trace individuals who can make use of the Maximum Bill and to obtain information on  
5 participants' frequency of utilization of oral health care services. This includes all attested  
6 dental treatments and regular preventive dental check-ups over a period from 2009 to 2013.  
7  
8 By consensus, participants are considered as regular dental attenders if IMA database reported  
9 at least one dental visit in three different years over a four-year period, excluding urgency  
10 treatments. Subsequently, a dichotomous variable has been created to distinguish regular  
11 dental attenders from non-regular dental attenders.  
12  
13  
14  
15  
16  
17  
18  
19

### 20 21 *Data analysis*

22  
23  
24 Data analysis was carried out in the IBM SPSS Statistics V22.0 (SPSS Inc., Chicago, IL,  
25 USA). Independent Sample T-test was used to compare underprivileged and more fortunate  
26 individuals for their mean DMFT, DMFS, Plaque index, Care Index, Restorative Index,  
27 Treatment Index, knowledge and attitude scores. A parametrical test was used, based on the  
28 central limit theorem. Differences in proportions for dichotomous variables (RI100%,  
29 TI100% and being a regular dental attender) have been compared in crosstabs, using a Chi  
30 Square statistical test. Alpha was set at  $< 0.05$ .  
31  
32  
33  
34  
35  
36  
37  
38  
39

40  
41 The approach used to deal with uncomplete records and so to avoid bias, was to compare the  
42 proportion of children eligible for the "Maximum Bill" in both responders and non-responders  
43 (no clinical data available), by using the Chi Square statistical test. This social parameter  
44 could be determined for all children by using the national registration number of the child and  
45 the IMA database.  
46  
47  
48  
49  
50

### 51 52 *Ethical aspects*

53  
54  
55 The present study was approved by the Ethics Committee of the University Hospital Ghent  
56 (2010/061). All parents signed an informed consent form prior to data collection. All schools  
57  
58  
59  
60

1  
2  
3 received information about the study protocol and agreed to participate. Children requiring  
4  
5 dental treatment or periodic recall were referred to the local dentist.  
6  
7

## 8 **Results**

9  
10 Sample consisted of 2,216 Flemish primary school children with a mean age of 11.25 years  
11  
12 (SD 0.68). Data analysis was performed in 88.2% (n=1,954). Incomplete records were due to  
13  
14 failure to obtain consent and child's absence from school on the day of examination. From  
15  
16 these 1,954 children, 1,771 completed the questionnaire. Comparing the social status of  
17  
18 responders and non-responders, the proportion of children eligible for the 'Maximum Bill'  
19  
20 was equal for both groups (Chi Square Test; p=0.4).  
21  
22  
23

24  
25 More than 19% (n=374) of the children made use of the Maximum Bill. Being part of this  
26  
27 subgroup significantly affected oral health and oral health behaviour, as demonstrated in table  
28  
29 1. Underprivileged children showed worse outcomes for all explanatory variables. They had a  
30  
31 higher plaque index and higher DMFT and DMFs scores, both at D1 and D3 level. Overall  
32  
33 care level was significantly lower, resulting in a lower care index, treatment index and  
34  
35 restorative index. Both knowledge and attitude scores were slightly but significantly lower in  
36  
37 low-income children.  
38  
39

40  
41 Regarding the proportion of participants being completely treated for caries, underprivileged  
42  
43 children again differ from their more fortunate counterparts. According to table 2, 78.4% of  
44  
45 the low-income children were caries free (DMFT=0), compared to 88.4% for the high income  
46  
47 group. From those having a DMFT>0, 55.3% of the Maximum Bill group children were  
48  
49 found to have a 100% Treatment index against 65.8% for children of higher social class. The  
50  
51 same trend appeared when comparing the 100% Restorative index, resulting in strongly  
52  
53 significant differences. Half of the low-income children (50.3%) could be considered as  
54  
55 regular dental attenders for the period between 2009 and 2013, whereas 12.6% did not have  
56  
57  
58  
59  
60

1  
2  
3 any dental visit during these five year period. Middle- and high-income children visited the  
4 dentist on a more regular base, resulting in a 77.7% rate for regular dental attendance. Only  
5 3.4% of these children did not report any dental visit. All of these differences proved to be  
6 statistically significant.  
7  
8  
9  
10

## 11 **Discussion**

12  
13 Oral health inequalities are clearly visible within the present sample of primary school  
14 children. Since 2,216 subjects were randomly selected in 105 different primary schools in  
15 Flanders, results can be extrapolated to the entire Flemish region.  
16  
17

18  
19 All included oral health parameters were strongly significantly affected by participants' social  
20 class. Not only caries experience, by means of DMFT and DMFs, proved to be higher in  
21 underprivileged groups, but also oral hygiene (plaque index) and the level of care seemed to  
22 depend on families' social context. This level of care was assessed by means of the restorative  
23 index, care index and treatment index. These indices could only be calculated for children  
24 having a DMFT > 0. This was mathematically declared in the methodological section, by  
25 explaining that it is impossible to divide by "0", which would be the case for those having a  
26 DMFT =0. Also clinically, this would be irrelevant, because the indices aim to calculate the  
27 proportion of the decayed teeth which have been restored or extracted. If there is no caries  
28 experience at all (DMFT=0), these indices are not applicable.  
29  
30  
31  
32  
33  
34  
35  
36  
37  
38  
39  
40  
41  
42  
43  
44  
45  
46  
47  
48

49 An arithmetic gap of 11.87, 8.34 and 9.96 emerges when comparing Care index, Treatment  
50 index and Restorative index for middle/high-income and low income children, in  
51 disadvantage of the latter group. The three indices do not all have the same meaning.  
52 Restorative index ( $RI = (Ft / (D3 + Ft)) * 100$ ) does not consider the missing teeth, because there  
53 can be doubts whether teeth were removed due to caries or due to other factors (trauma,  
54  
55  
56  
57  
58  
59  
60

1  
2  
3 periodontal infection). Care index ( $CI = (Ft / (D3 + M + Ft)) * 100$ ) partially involves the missing  
4  
5 teeth, but the index does not consider a tooth extraction as a 'solution', but as part of the  
6  
7 problem. Children are literally 'missing' a tooth, so tooth extraction it is seen as a 'lost  
8  
9 chance'. On the other hand, Treatment Index ( $TI = ((M + Ft) / (D3 + M + Ft)) * 100$ ) proposes tooth  
10  
11 extraction as part of the solution, because it removes a (potential) focus of infection. It gives  
12  
13 the same value to fillings and extractions. None of these indices can be considered as 'all-  
14  
15 embracing', so it is good to compare them. When two subgroups differ significantly in  
16  
17 restorative index, but not in treatment index, this means that one of the groups received more  
18  
19 tooth extractions, which can be relevant to explore the severity of the disease and the way of  
20  
21 treating it. The present findings suggest that the low-income children had more teeth being  
22  
23 extracted, although it is hard to determine the clinical relevance of a 1% difference between  
24  
25 treatment index and restorative index.  
26  
27  
28

29  
30 Statistical analysis clearly demonstrates underprivileged children to visit less frequently the  
31  
32 dental practitioner. One out of eight low-income children (12.6%) did not see a dentist one  
33  
34 single time during the five years prior to data collection. This dental absenteeism is almost  
35  
36 four times higher in underprivileged groups compared to the more fortunate subgroups.  
37  
38

39  
40 The present Flemish/Belgian results on oral health inequalities are not a unique phenomenon,  
41  
42 but are in accordance with global findings. International literature is overloaded with recent  
43  
44 evidence demonstrating social inequalities in oral health. A systematic review by  
45  
46 Schwendicke shows that low social class is associated with an increased risk of dental caries,  
47  
48 especially in more developed countries (12). Childhood financial hardship not only has a main  
49  
50 impact on individuals oral health during childhood, but also in later life. Poulton et al. (13)  
51  
52 revealed that low childhood socio-economic status (SES) contributes to increased adult levels  
53  
54 of caries and periodontal disease, even after adjusting for adult SES. Listl et al. (14)  
55  
56  
57  
58  
59  
60

1  
2  
3 confirmed these findings, showing the long-term adverse effects of financial problems in  
4  
5 childhood on oral health in middle and later adulthood.  
6  
7

8 The today's persistence of social inequalities, both in Flanders and in the entire world, is food  
9  
10 for thought. From the most negative point of view, one could state that all previous oral health  
11  
12 promotion campaigns, health promoting schools and governmental interventions simply failed  
13  
14 to close the social gap in oral health. Unfortunately, the present cross-sectional survey is not  
15  
16 able to uncover a specific reason for this failure. What needs to be considered and further  
17  
18 investigated, is the key role played by the family and environmental context in children's  
19  
20 dental adherence. It is clear that 12-year old children cannot be taken fully responsible for  
21  
22 being a dental non-attender. A systematic review of Freire de Castilho (15) reveals that  
23  
24 parental oral health habits affects children's oral health. For this reason, the authors of this  
25  
26 review state that oral health promotion programs need to put emphasis on the entire family  
27  
28 context, concerning their lifestyle and oral health behaviour.  
29  
30  
31  
32

33 Regarding the financial aspect, basic dental costs are completely reimbursed in Belgium for  
34  
35 all children under the age of 18 without distinction, so in fact differences in utilization of  
36  
37 health care services for financial reasons are not expected. However, in most dental practices,  
38  
39 the often high dental fee needs to be paid first by the client "out of pocket", to get it  
40  
41 reimbursed by the health insurance agency afterwards. Third party payment, in which the  
42  
43 health insurance agency pays the dental fee directly to the dental practitioner instead of the  
44  
45 client, is allowed for all minors, but not well established. Further, 37.36% of the Belgian  
46  
47 dentists did not take part in the fee convention, bearing a risk of potentially increased dental  
48  
49 costs. The authors cannot draw conclusions in this respect, but want to express the need to  
50  
51 determine the principal cause(s) of oral health inequalities. The specific provider payment  
52  
53 method can be one of the factors, but probably not the only one. Regarding knowledge and  
54  
55 attitude of the children in this study, there are statistically significant differences between both  
56  
57  
58  
59  
60

1  
2  
3 social subgroups. However, a mean difference of 0.27 in attitude (on a score out of ten) might  
4  
5 be of little clinical relevance to explain the existing inequalities. For children's knowledge,  
6  
7 this gap is bigger, with a mean difference of 0.80 in knowledge scores. Differences in  
8  
9 knowledge and health literacy, attitude and lifestyle need further investigated, not only for  
10  
11 children, but also for the parents.  
12

13  
14 Although oral health inequalities have always existed and are still remaining, society cannot  
15  
16 simply acquiesce in its existence. Dental caries is largely preventable, but still remains the  
17  
18 most prevalent chronic disease worldwide, mainly affecting high-risk subgroups (1,16).  
19  
20 Dental treatment is expensive, absorbing a considerable part of overall health care budget  
21  
22 (17). Focussing on prevention and tackling oral health inequalities not only improve  
23  
24 individuals' oral health and quality of life, but can also help in reducing governmental costs.  
25  
26 Watt et al. (18) call in the "London Charter on Oral Health Inequalities" for a more upstream  
27  
28 public health approach, targeting the deeper social, political and economic causes of oral  
29  
30 health inequalities. They advocate new multidisciplinary preventive strategies at local,  
31  
32 regional, national and international levels, based on a common risk factor approach. Quoting  
33  
34 the authors, "collaborative efforts among researchers, policy makers, public health  
35  
36 practitioners, clinical teams, and the public are urgently required". So, decisions on oral health  
37  
38 promotion and tackling oral health inequalities should not exclusively be made by  
39  
40 policymakers, but also involve dentists and intermediate partner organizations.  
41  
42  
43  
44  
45

46 The 'Marmot Review' (19) provides a guidance to assess the social gradient in health, by  
47  
48 introducing the method of 'proportionate universalism'. Interventions don't need to focus  
49  
50 only on the most disadvantaged individuals, but should be universal and contain a scale and  
51  
52 intensity in accordance with subgroups' level of disadvantage.  
53  
54  
55  
56  
57  
58  
59  
60



1  
2  
3 The authors understand that the oral health status of Belgian children might be of less  
4  
5 relevance in international literature. Although, this survey describes a very relevant theme:  
6  
7 social inequalities in health. Of course, many other authors did research on this topic.  
8  
9 However, the present study certainly has an added value. What pleads in favour, is the large  
10  
11 sample of children with the same age, but more important, the objective and reliable link that  
12  
13 was provided between children's oral health, their social status and their oral health care  
14  
15 utilization. Oral health was investigated by calibrated and blinded dentists. Afterwards, these  
16  
17 findings were linked to people's social class, not by interviewing the patients or their parents,  
18  
19 but by exploring data of the national health institute. In this way, dental examiners were  
20  
21 blinded, and people could not 'hide' their social status for the researchers. Furthermore, the  
22  
23 same database revealed the most reliable information on oral health care utilization. Mostly,  
24  
25 dental attendance is assessed by means of a questionnaire, inevitably leading to bias. In this  
26  
27 survey, every single dental visit of a child could be linked to its corresponding record. It is  
28  
29 obvious that this kind of survey requires a strict procedure, to ensure children's medical data  
30  
31 and privacy. Because of the sensitive character of the information, studies with the same  
32  
33 setting are very rare. A short literature search on Pubmed with the following string "Oral  
34  
35 Health"[Mesh] AND "health care utilization"[All Fields]" resulted in only 7 hits. Two  
36  
37 Nigerian surveys reported on almost the same subject, but both of them used a self-  
38  
39 administered questionnaire (20-21).  
40  
41  
42  
43  
44

45  
46 The authors also have to report some limitations of the study. Although oral health figures can  
47  
48 be comparable with other western countries, the present sample only included Belgian  
49  
50 subjects. Further, the cross-sectional study design does not allow the authors to identify  
51  
52 specific causes for inequalities in oral health and dental non-attendance, only associations.  
53  
54

55  
56 Since Glimlachen.be® is a four-year longitudinal program visiting schools, most of the  
57  
58 subjects will have received previous dental screenings before the present data collection.  
59  
60

1  
2  
3 These screenings might have positively influenced the oral health and oral health behaviour of  
4  
5 all children, resulting in an underestimation of oral health related problems. However, this  
6  
7 influence should be equal for both compared groups.  
8  
9

## 10 **Conclusion**

11  
12 Oral health inequalities are an undeniable reality in primary school children in  
13  
14 Flanders/Belgium. Oral health, oral hygiene, oral health care level and dental attendance  
15  
16 patterns are negatively affected by children's social class.  
17  
18  
19

## 20 **Acknowledgement**

21  
22 The research presented in this report is part of the 'Glimlachen.be' project  
23  
24 ([www.glimlachen.be](http://www.glimlachen.be)), commissioned and financed by the 'Insurance Committee for Health  
25  
26 Care' of the 'Belgian National Institute for Health and Disability Insurance'.  
27  
28  
29

30 The authors thank the Flemish Dental Association (VVT), the dentist examiners and dental  
31  
32 assistants and the school for their collaboration. All authors do not declare any potential  
33  
34 conflict of interest.  
35  
36  
37

## 38 **Contributorship statement**

39  
40 All authors declare to have had substantial contributions to the conception and design of the  
41  
42 work, to have drafted and revised the work for important intellectual content. All authors gave  
43  
44 final approval of the version to be published; and agreement to be accountable for all aspects  
45  
46 of the work.  
47  
48  
49

50 The corresponding author is drs. Martijn Lambert, dentist and researcher of Ghent University,  
51  
52 department of Community Dentistry and Oral Public Health. His task was to analyze data and  
53  
54 write the present article. Prof. Dr. J. Vanobbergen, Prof. Dr. L. De Visschere and Prof. Dr. L.  
55  
56 Martens are the PhD supervisors of drs. Lambert. They are all participating in the  
57  
58  
59  
60

1  
2  
3 'Glimlachen.be' project from its very beginning. In that way, they could provide essential  
4  
5 information on data collection procedure and other methodological aspects of the present  
6  
7 study. Their expertise was indispensable to realize this publication.  
8  
9

### 10 **Competing interests**

11  
12 All co-authors declare no competing interests  
13  
14

### 15 **Funding**

16  
17  
18 There was no funding to analyze data or to report this paper. The only funding corresponds to  
19  
20 data collection (see acknowledgement).  
21  
22  
23

### 24 **Data sharing statement**

25  
26  
27 Patient leveled data or full data set and statistical code book are available from the  
28  
29 corresponding author on request.  
30  
31  
32  
33  
34  
35  
36  
37  
38  
39  
40  
41  
42  
43  
44  
45  
46  
47  
48  
49  
50  
51  
52  
53  
54  
55  
56  
57  
58  
59  
60

## References

1. Marcenes W, Kassebaum NJ, Bernabe E, et al. Global burden of oral conditions in 1990-2010: a systematic analysis. *J Dent Res* 2013;92(7):592-597.
2. Edelstein BL. Pediatric caries worldwide: implications for oral hygiene products. *Compend Contin Educ Dent* 2005;26(5 Suppl 1):4-9.
3. Moynihan P. Sugars and Dental Caries: Evidence for Setting a Recommended Threshold for Intake. *Adv Nutr* 2016;15;7(1):149-56. DOI: 10.3945/an.115.009365.
4. Chaves SC, Vieira-da-Silva LM. Anticaries effectiveness of fluoride toothpaste: a meta-analysis. *Rev Saude Publica* 2002;36(5):598-606.
5. Van den Branden S, Van den Broucke S, Leroy R, et al. Oral health and oral health-related behaviour in preschool children: evidence for a social gradient. *Eur J Pediatr* 2013;172:231-37.
6. Declerck D, Leroy R, Martens L, et al. Factors associated with prevalence and severity of caries experience in preschool children. *Community Dent Oral Epidemiol* 2008;36:168-178.
7. Do LG. Distribution of Caries in children: variations between and within populations. *J Dent Res* 2012;91(6):536-543.
8. Willems S, Vanobbergen J, Martens L, et al. The independent impact of Household- and neighbourhood-based social determinants on Early Childhood Caries. *Fam Community Health* 2005;28:168-175.
9. Vanobbergen JN, Martens LC, Lesaffre E, et al. Parental occupational status related to dental caries experience in 7-year-old children in Flanders (Belgium). *Community Dent Health* 2001;18(4):256-262.

- 1  
2  
3 10. Listl S, Moeller J, Manski R. A multi-country comparison of reasons for dental non-  
4 attendance. *Eur J Oral Sci* 2014;122(1):62-9.  
5  
6  
7  
8 11. Löe H. The Gingival Index, the Plaque Index, and the Retention Index Systems. *J*  
9 *Periodontol* 1967;38:610-616.  
10  
11  
12  
13 12. Schwendicke F, Dörfer CE, Schlattmann P, et al. Socio-economic inequality and caries: a  
14 systematic review and meta-analysis. *J Dent Res* 2015;94(1):10-18.  
15  
16  
17  
18 13. Poulton R, Caspi A, Milne BJ, et al. Association between children's experience of socio-  
19 economic disadvantage and adult health: a life-course study. *The Lancet*  
20 2002;360(9346):1640-1645.  
21  
22  
23  
24  
25  
26 14. Listl S, Watt RG, Tsakos G. Early Life Conditions, Adverse Life Events, and Chewing  
27 Ability at Middle and Later Adulthood. *Am J Public Health* 2014;104:55-61.  
28  
29  
30  
31 15. Freire de Castilho AR, Mialhe FL, de Souza Barbosa T, et al. Influence of family  
32 environment on children's oral health: a systematic review. *J Pediatr (Rio J)*  
33 2013;89(2):116-123.  
34  
35  
36  
37  
38 16. Kassebaum NJ, Bernabé E, Dahiya M. Global Burden of Untreated Caries: A Systematic  
39 Review and Metaregression. *J Dent Res* 2015;94(5) 650-658.  
40  
41  
42  
43 DOI:10.1177/0022034515573272  
44  
45  
46 17. Listl S, Galloway J, Mossey PA. Global economic impact of dental diseases. *J Dent Res*  
47 2015;94(10):1355-1361.  
48  
49  
50  
51 18. Watt RG, Heilmann A, Listl S, Peres MA. London Charter on Oral Health Inequalities. *J*  
52 *Dent Res* 2015;1-3. DOI: 10.1177/0022034515622198  
53  
54  
55  
56  
57  
58  
59  
60

- 1  
2  
3 19. Marmot M et al. Fair society, healthy lives: The Marmot review, executive summary  
4  
5 [Internet]. London: The Marmot Review. Februari 2010; ISBN 978-0-9564870-0-1:  
6  
7 <http://www.instituteofhealthequity.org/projects/fair-society-healthy-lives-the-marmot-review>  
8  
9
- 10 20. Onyejaka NK, Folayan MO, Folaranmi N. Barriers and facilitators of dental service  
11  
12 utilization by children aged 8 to 11 years in Enugu State, Nigeria. *BMC Health Serv Res* 2016  
13  
14 Mar 15;16:93. doi: 10.1186/s12913-016-1341-6.  
15  
16
- 17 21. Ajayi DM, Arigbede AO. Barriers to oral health care utilization in Ibadan, South West  
18  
19 Nigeria. *Afr Health Sci* 2012 Dec;12(4):507-13.  
20  
21  
22  
23  
24  
25  
26  
27  
28  
29  
30  
31  
32  
33  
34  
35  
36  
37  
38  
39  
40  
41  
42  
43  
44  
45  
46  
47  
48  
49  
50  
51  
52  
53  
54  
55  
56  
57  
58  
59  
60

Table 1: Oral health and oral health behaviour between children from low income (utilizing the 'Maximum Bill') and middle-to-high income families.

|                                            | Maximum Bill | N    | Mean  | SD    | Mean diff. | 95%CI          | p-value          |
|--------------------------------------------|--------------|------|-------|-------|------------|----------------|------------------|
| <b>Mean Plaque index</b><br>(missing = 1)  | No           | 1602 | 0.41  | 0.48  | -0.17      | [-0.23; -0.12] | <b>&lt;0.001</b> |
|                                            | Yes          | 351  | 0.59  | 0.58  |            |                |                  |
| <b>DMFt (D1-level)</b><br>(missing = 1)    | No           | 1601 | 1.68  | 2.05  | -1.12      | [-1.36; -0.87] | <b>&lt;0.001</b> |
|                                            | Yes          | 352  | 2.79  | 2.43  |            |                |                  |
| <b>DMFt (D3-level)</b><br>(missing = 2)    | No           | 1600 | 0.78  | 1.42  | -0.47      | [-0.64; -0.30] | <b>&lt;0.001</b> |
|                                            | Yes          | 352  | 1.25  | 1.68  |            |                |                  |
| <b>DMFs (D1-level)</b><br>(missing = 0)    | No           | 1602 | 2.30  | 3.25  | -1.72      | [-2.11; -1.32] | <b>&lt;0.001</b> |
|                                            | Yes          | 352  | 4.02  | 4.07  |            |                |                  |
| <b>DMFs (D3-level)</b><br>(missing = 0)    | No           | 1602 | 1.18  | 2.51  | -0.83      | [-1.13; -0.52] | <b>&lt;0.001</b> |
|                                            | Yes          | 352  | 2.00  | 3.16  |            |                |                  |
| <b>Care index*</b><br>(missing = 0)        | No           | 544  | 70.33 | 42.14 | 11.87      | [4.47; 19.27]  | <b>&lt;0.001</b> |
|                                            | Yes          | 170  | 58.46 | 45.17 |            |                |                  |
| <b>Treatment index*</b><br>(missing = 0)   | No           | 544  | 73.13 | 40.83 | 8.34       | [1.18; 15.51]  | <b>0.02</b>      |
|                                            | Yes          | 170  | 64.79 | 43.75 |            |                |                  |
| <b>Restorative index*</b><br>(missing = 0) | No           | 537  | 72.18 | 41.57 | 9.96       | [2.54; 17.38]  | <b>0.01</b>      |
|                                            | Yes          | 164  | 62.22 | 44.79 |            |                |                  |
| <b>Knowledge</b><br>(missing = 183)        | No           | 1483 | 7.58  | 2.12  | 0.80       | [0.52; 1.07]   | <b>&lt;0.001</b> |
|                                            | Yes          | 288  | 6.78  | 2.49  |            |                |                  |
| <b>Attitude</b><br>(missing = 183)         | No           | 1482 | 8.37  | 1.32  | 0.27       | [0.10; 0.44]   | <b>0.002</b>     |
|                                            | Yes          | 289  | 8.10  | 1.44  |            |                |                  |

\*of those having DMFt>0

Table 2: Dental Compliance and Caries Free proportions between children from low income (using the "Maximum Bill") and middle-to-high income families

| Variable                                 | Maximum Bill   |               | p-value          |
|------------------------------------------|----------------|---------------|------------------|
|                                          | No             | Yes           |                  |
| Treatment index (TI=100%) <sup>^</sup>   | 65.8% (n=358)  | 55.3% (n=94)  | <b>0.01</b>      |
| Restorative index (RI=100%) <sup>^</sup> | 65.4% (n=351)  | 53.7% (n=88)  | <b>0.008</b>     |
| Regular dental attender*                 | 77.7% (n=1344) | 50.3% (n=188) | <b>&lt;0.001</b> |
| No dental visit between 2009 and 2013    | 3.4% (n=59)    | 12.6% (n=47)  | <b>&lt;0.001</b> |
| Caries free proportion                   | 88.4% (n=1414) | 78.4% (n=276) | <b>&lt;0.001</b> |

<sup>^</sup> Dichotomous explanatory variable

\* at least one dental visit in three different years over a four-year period, excluding urgency treatments



## STROBE Statement—checklist of items that should be included in reports of observational studies

|                              | Item No | Recommendation                                                                                                                                                                                                                                                                                                                                                                                                                                                                                                                                                                                                                                                                                                 |
|------------------------------|---------|----------------------------------------------------------------------------------------------------------------------------------------------------------------------------------------------------------------------------------------------------------------------------------------------------------------------------------------------------------------------------------------------------------------------------------------------------------------------------------------------------------------------------------------------------------------------------------------------------------------------------------------------------------------------------------------------------------------|
| <b>Title and abstract</b>    | 1       | (a) Indicate the study's design with a commonly used term in the title or the abstract<br><b>Cross-sectional survey (title page)</b><br>(b) Provide in the abstract an informative and balanced summary of what was done and what was found<br><b>Page 2</b>                                                                                                                                                                                                                                                                                                                                                                                                                                                   |
| <b>Introduction</b>          |         |                                                                                                                                                                                                                                                                                                                                                                                                                                                                                                                                                                                                                                                                                                                |
| Background/rationale         | 2       | Explain the scientific background and rationale for the investigation being reported<br><b>Background (page 4)</b>                                                                                                                                                                                                                                                                                                                                                                                                                                                                                                                                                                                             |
| Objectives                   | 3       | State specific objectives, including any prespecified hypotheses<br><b>Objectives (page 5)</b>                                                                                                                                                                                                                                                                                                                                                                                                                                                                                                                                                                                                                 |
| <b>Methods</b>               |         |                                                                                                                                                                                                                                                                                                                                                                                                                                                                                                                                                                                                                                                                                                                |
| Study design                 | 4       | Present key elements of study design early in the paper<br><b>Page 6</b>                                                                                                                                                                                                                                                                                                                                                                                                                                                                                                                                                                                                                                       |
| Setting                      | 5       | Describe the setting, locations, and relevant dates, including periods of recruitment, exposure, follow-up, and data collection<br><b>Page 6</b>                                                                                                                                                                                                                                                                                                                                                                                                                                                                                                                                                               |
| Participants                 | 6       | (a) <i>Cohort study</i> —Give the eligibility criteria, and the sources and methods of selection of participants. Describe methods of follow-up<br><i>Case-control study</i> —Give the eligibility criteria, and the sources and methods of case ascertainment and control selection. Give the rationale for the choice of cases and controls<br><i>Cross-sectional study</i> —Give the eligibility criteria, and the sources and methods of selection of participants <b>Page 6</b><br>(b) <i>Cohort study</i> —For matched studies, give matching criteria and number of exposed and unexposed<br><i>Case-control study</i> —For matched studies, give matching criteria and the number of controls per case |
| Variables                    | 7       | Clearly define all outcomes, exposures, predictors, potential confounders, and effect modifiers. Give diagnostic criteria, if applicable <b>Data collection (page 6-7)</b>                                                                                                                                                                                                                                                                                                                                                                                                                                                                                                                                     |
| Data sources/<br>measurement | 8*      | For each variable of interest, give sources of data and details of methods of assessment (measurement). Describe comparability of assessment methods if there is more than one group <b>(Page 7)</b>                                                                                                                                                                                                                                                                                                                                                                                                                                                                                                           |
| Bias                         | 9       | Describe any efforts to address potential sources of bias <b>Calibration of examiners (Page 6-7)</b>                                                                                                                                                                                                                                                                                                                                                                                                                                                                                                                                                                                                           |
| Study size                   | 10      | Explain how the study size was arrived at <b>Study design, settings and population (Page 6)</b>                                                                                                                                                                                                                                                                                                                                                                                                                                                                                                                                                                                                                |
| Quantitative variables       | 11      | Explain how quantitative variables were handled in the analyses. If applicable, describe which groupings were chosen and why <b>Page 7-8</b>                                                                                                                                                                                                                                                                                                                                                                                                                                                                                                                                                                   |
| Statistical methods          | 12      | (a) Describe all statistical methods, including those used to control for confounding<br><b>Data analysis (page 8)</b><br>(b) Describe any methods used to examine subgroups and interactions<br><b>Page 8</b><br>(c) Explain how missing data were addressed <b>Page 9</b>                                                                                                                                                                                                                                                                                                                                                                                                                                    |

1  
2  
3  
4  
5  
6  
7  
8  
9  
10  
11  
12  
13  
14  
15  
16  
17  
18  
19  
20  
21  
22  
23  
24  
25  
26  
27  
28  
29  
30  
31  
32  
33  
34  
35  
36  
37  
38  
39  
40  
41  
42  
43  
44  
45  
46  
47  
48  
49  
50  
51  
52  
53  
54  
55  
56  
57  
58  
59  
60

---

(d) *Cohort study*—If applicable, explain how loss to follow-up was addressed  
*Case-control study*—If applicable, explain how matching of cases and controls was addressed  
*Cross-sectional study*—If applicable, describe analytical methods taking account of sampling strategy **Page 6**

---

(e) Describe any sensitivity analyses **Not applicable**

Continued on next page

For peer review only

**Results**

|                  |     |                                                                                                                                                                                                                                                                                                                                                                                                                                                              |
|------------------|-----|--------------------------------------------------------------------------------------------------------------------------------------------------------------------------------------------------------------------------------------------------------------------------------------------------------------------------------------------------------------------------------------------------------------------------------------------------------------|
| Participants     | 13* | (a) Report numbers of individuals at each stage of study—eg numbers potentially eligible, examined for eligibility, confirmed eligible, included in the study, completing follow-up, and analysed <b>Page 9</b><br>(b) Give reasons for non-participation at each stage <b>Page 10</b><br>(c) Consider use of a flow diagram <b>Not applicable (cross-sectional design)</b>                                                                                  |
| Descriptive data | 14* | (a) Give characteristics of study participants (eg demographic, clinical, social) and information on exposures and potential confounders <b>Page 10</b><br>(b) Indicate number of participants with missing data for each variable of interest <b>Table 1 (Page 18)</b><br>(c) <i>Cohort study</i> —Summarise follow-up time (eg, average and total amount)                                                                                                  |
| Outcome data     | 15* | <i>Cohort study</i> —Report numbers of outcome events or summary measures over time<br><i>Case-control study</i> —Report numbers in each exposure category, or summary measures of exposure<br><i>Cross-sectional study</i> —Report numbers of outcome events or summary measures<br><b>Tables page 17-18</b>                                                                                                                                                |
| Main results     | 16  | (a) Give unadjusted estimates and, if applicable, confounder-adjusted estimates and their precision (eg, 95% confidence interval). Make clear which confounders were adjusted for and why they were included<br>(b) Report category boundaries when continuous variables were categorized <b>Table 2 (Page 19)</b><br>(c) If relevant, consider translating estimates of relative risk into absolute risk for a meaningful time period <b>Not applicable</b> |
| Other analyses   | 17  | Report other analyses done—eg analyses of subgroups and interactions, and sensitivity analyses <b>Not applicable</b>                                                                                                                                                                                                                                                                                                                                         |

**Discussion**

|                  |    |                                                                                                                                                                                                         |
|------------------|----|---------------------------------------------------------------------------------------------------------------------------------------------------------------------------------------------------------|
| Key results      | 18 | Summarise key results with reference to study objectives <b>Page 10</b>                                                                                                                                 |
| Limitations      | 19 | Discuss limitations of the study, taking into account sources of potential bias or imprecision. Discuss both direction and magnitude of any potential bias<br><b>Strengths and limitations (page 3)</b> |
| Interpretation   | 20 | Give a cautious overall interpretation of results considering objectives, limitations, multiplicity of analyses, results from similar studies, and other relevant evidence<br><b>Page 10-11</b>         |
| Generalisability | 21 | Discuss the generalisability (external validity) of the study results<br><b>Page 10</b>                                                                                                                 |

**Other information**

|         |    |                                                                                                                                                                                                   |
|---------|----|---------------------------------------------------------------------------------------------------------------------------------------------------------------------------------------------------|
| Funding | 22 | Give the source of funding and the role of the funders for the present study and, if applicable, for the original study on which the present article is based<br><b>Acknowledgement (page 13)</b> |
|---------|----|---------------------------------------------------------------------------------------------------------------------------------------------------------------------------------------------------|

\*Give information separately for cases and controls in case-control studies and, if applicable, for exposed and unexposed groups in cohort and cross-sectional studies.

**Note:** An Explanation and Elaboration article discusses each checklist item and gives methodological background and published examples of transparent reporting. The STROBE checklist is best used in conjunction with this article (freely available on the Web sites of PLoS Medicine at <http://www.plosmedicine.org/>, Annals of Internal Medicine at

1  
2  
3  
4  
5  
6  
7  
8  
9  
10  
11  
12  
13  
14  
15  
16  
17  
18  
19  
20  
21  
22  
23  
24  
25  
26  
27  
28  
29  
30  
31  
32  
33  
34  
35  
36  
37  
38  
39  
40  
41  
42  
43  
44  
45  
46  
47  
48  
49  
50  
51  
52  
53  
54  
55  
56  
57  
58  
59  
60

<http://www.annals.org/>, and Epidemiology at <http://www.epidem.com/>). Information on the STROBE Initiative is available at [www.strobe-statement.org](http://www.strobe-statement.org).

For peer review only
